# Supplementary material for: Identification of Dietary Bioflavonoids as Potential Inhibitors against KRAS G12D Mutant—Novel Insights from Computer-Aided Drug Discovery
Source: MDPI journal article supplement (doi:10.3390/cimb45030137), 2023-03-06
Supplement: s1 [file s1]

## Supplementary materials

# Identification of Dietary Bioflavonoids as Potential Inhibitors against KRAS G12D Mutant—Novel Insights from Computer-Aided Drug Discovery

Prasanna Srinivasan Ramalingam <sup>1,2,†</sup>, Purushothaman Balakrishnan <sup>2,†</sup>, Senthilnathan Rajendran <sup>3</sup>, Arunachalam Jothi <sup>3</sup>, Rajasekaran Ramalingam <sup>4</sup> and Sivakumar Arumugam <sup>1,\*</sup>

<sup>1</sup> Protein Engineering lab, School of Biosciences and Technology, VIT University, Vellore 632014, Tamil Nadu, India

<sup>2</sup> TanBio R and D Solution, Thanjavur 613403, Tamil Nadu, India

<sup>3</sup> Department of Bioinformatics, School of Chemical and Biotechnology, SASTRA Deemed University, Thanjavur 613401, Tamil Nadu, India

<sup>4</sup> Quantitative Biology Lab, School of Biosciences and Technology, VIT University, Vellore 632014, Tamil Nadu, India

\* Correspondence: siva\_kumar.a@vit.ac.in

† These authors contributed equally to this work.

**Contents:**

**Supplementary Table S1:** Binding energies of all 514 bioflavonoids with the KRAS G12D mutant protein.

**Supplementary Table S2:** Kinase targets of top 4 lead flavonoids.

**Supplementary Figure S1:** Binding poses and molecular interactions of BI-2852 in crystallized and docked forms.

**Supplementary Figure S2:** Binding energies of BI-2852 and top 4 lead flavonoids against KRAS G12D mutant protein.

**Supplementary Table S1:** Binding energies of all 514 bioflavonoids with the KRAS G12D mutant protein. The binding energy (Kcal/mol) of all the compounds were tabulated according to their higher negative values and the BI-2852 was shown in bold.

| Ligand model number | Flavonoid/ Compound name                | Canonical SMILES                                                                                    | Binding Affinity |
|---------------------|-----------------------------------------|-----------------------------------------------------------------------------------------------------|------------------|
| model_684           | 5-Dehydroxyparatocarpin K               | <chem>Oc1ccc(cc1)C1CC(=O)c2c(O1)cc1c(c2)C=CC(O1)(C)C</chem>                                         | -8.8             |
| model_298           | Carpachromene                           | <chem>Oc1ccc(cc1)c1cc(=O)c2c(O1)cc1c(c2O)C=CC(O1)(C)C</chem>                                        | -8.6             |
| model_765           | Sanggenone H                            | <chem>Oc1cc2OC(CC(=O)c2c(c1O)c1ccc(c2c1OC(C)(C)C=C2)O</chem>                                        | -8.6             |
| model_654           | Kuwanol C                               | <chem>CC(=CCCC1(C)C=Cc2c(O1)cc1c(c2O)C(=O)CC(O1)c1ccc(c1O)O)C</chem>                                | -8.5             |
| Reference           | <b>BI-2852</b>                          | <b><chem>CN1C=C(N=C1)CN2C=CC3=C2C=C(C=C3)CNCC4=C(C5=CC=CC=C5N4)C6C7=C(C=CC(=C7)O)C(=O)N6</chem></b> | <b>-8.5</b>      |
| model_379           | Kazinol B                               | <chem>CC(=CCc1c(cc2c(c1O)OC(C=C2)(C)C)C1CCc2c(O1)cc(cc2)O)C</chem>                                  | -8.4             |
| model_395           | Cyclomorusin                            | <chem>CC(=CC1Oc2cc(O)ccc2c2c1c(=O)c1c(O2)c2C=CC(Oc2cc1O)(C)C)C</chem>                               | -8.4             |
| model_874           | Furano(2'',3'',7,6)-4'-hydroxyflavanone | <chem>Oc1ccc(cc1)C1CC(=O)c2c(O1)cc1c(c2)cco1</chem>                                                 | -8.4             |
| model_138           | Barbacarpan                             | <chem>CC(=C)C1Oc2c(C1)c1OC3C(c1cc2)COc1c3ccc(c1)O</chem>                                            | -8.3             |
| model_816           | Licoisoflavone B                        | <chem>Oc1cc(O)c2c(c1)occ(c2=O)c1ccc2c(c1O)C=CC(O2)(C)C</chem>                                       | -8.3             |
| model_100           | Maackiain                               | <chem>Oc1ccc2c(c1)OCC1C2Oc2c1cc1c(c2)OCO1</chem>                                                    | -8.2             |
| model_799           | Ophiopogonanone A                       | <chem>O=C1C(COc2c1c(O)c(c(c2O)C)Cc1ccc2c(c1)OCO2</chem>                                             | -8.2             |
| model_92            | Glabridin                               | <chem>Oc1ccc(c(c1O)C1COc2c(C1)ccc1c2C=CC(O1)(C)C</chem>                                             | -8.2             |
| model_970           | Cudraflavone B                          | <chem>CC(=CCc1c(oc2c(c1=O)c(O)c1c(c2)OC(C=C1)(C)C)c1ccc(c1O)O)C</chem>                              | -8.2             |
| model_814           | Glabrene                                | <chem>Oc1ccc2c(c1)OCC(=C2)c1ccc(c2c1OC(C)(C)C=C2)O</chem>                                           | -8.1             |
| model_257           | Methylophiopogonanone A                 | <chem>O=C1C(COc2c1c(O)c(C)c(c2C)O)Cc1ccc2c(c1)OCO2</chem>                                           | -8               |
| model_400           | Butin                                   | <chem>Oc1ccc2c(c1)OC(CC2=O)c1ccc(c(c1)O)O</chem>                                                    | -8               |
| model_689           | Methylophiopogonone A                   | <chem>Cc1c(O)c(C)c2c(c1O)c(=O)c(co2)Cc1ccc2c(c1)OCO2</chem>                                         | -8               |
| model_758           | Semilicoisoflavone B                    | <chem>Oc1cc(O)c2c(c1)occ(c2=O)c1cc(O)c2c(c1)C=CC(O2)(C)C</chem>                                     | -8               |
| model_785           | 7,8-Benzoflavone                        | <chem>O=c1cc(oc2c1ccc1c2cccc1)c1cccc1</chem>                                                        | -8               |
| model_1002          | Methylophiopogonone B                   | <chem>COc1ccc(cc1)Cc1coc2c(c1=O)c(O)c(c(c2C)O)C</chem>                                              | -7.9             |
| model_1056          | Ophiopogonanone B                       | <chem>COc1ccc(cc1)CC1COc2c(C1=O)c(O)c(c(c2O)C</chem>                                                | -7.9             |
| model_128           | Bavachin                                | <chem>CC(=CCc1cc2C(=O)CC(Oc2cc1O)c1ccc(cc1)O)C</chem>                                               | -7.9             |
| model_134           | Fustin                                  | <chem>Oc1ccc2c(c1)OC(C(C2=O)O)c1ccc(c(c1)O)O</chem>                                                 | -7.9             |

|            |                                      |                                                                         |      |
|------------|--------------------------------------|-------------------------------------------------------------------------|------|
| model_258  | Methylophiopogonanone B              | <chem>COc1ccc(cc1)CC1COc2c(C1=O)c(O)c(c(c2C)O)C</chem>                  | -7.9 |
| model_286  | Corylin                              | <chem>Oc1ccc2c(c1)occ(c2=O)c1ccc2c(c1)C=CC(O2)(C)C</chem>               | -7.9 |
| model_49   | Liquiritigenin                       | <chem>Oc1ccc(cc1)C1CC(=O)c2c(O1)cc(cc2)O</chem>                         | -7.9 |
| model_581  | 7-Hydroxy-3-(4-hydroxybenzyl)chromic | <chem>Oc1ccc(cc1)CC1COc2c(C1)ccc(c2)O</chem>                            | -7.9 |
| model_604  | Isoderrone                           | <chem>Oc1cc(O)c2c(c1)occ(c2=O)c1ccc2c(c1)C=CC(O2)(C)C</chem>            | -7.9 |
| model_624  | Cedeodarin                           | <chem>Oc1ccc(cc1O)C1Oc2cc(O)c(c(c2C(=O)C1O)O)C</chem>                   | -7.9 |
| model_839  | Poriol                               | <chem>Oc1ccc(cc1)C1CC(=O)c2c(O1)cc(c(c2O)C)O</chem>                     | -7.9 |
| model_1038 | Pomiferin                            | <chem>CC(=CCc1c2OC(C)(C)C=Cc2c2c(c1O)c(=O)c(co2)c1ccc(c(c1)O)O)C</chem> | -7.8 |
| model_1060 | Licoflavone A                        | <chem>CC(=CCc1cc2c(=O)cc(oc2cc1O)c1ccc(cc1)O)C</chem>                   | -7.8 |
| model_1066 | Glyasperin F                         | <chem>Oc1cc(O)c2c(c1)OCC(C2=O)c1ccc(c2c1OC(C)(C)C=C2)O</chem>           | -7.8 |
| model_118  | Dihydromorin                         | <chem>Oc1ccc(c(c1)O)C1Oc2cc(O)cc(c2C(=O)C1O)O</chem>                    | -7.8 |
| model_169  | Fisetin                              | <chem>Oc1ccc2c(c1)oc(c(c2=O)O)c1ccc(c(c1)O)O</chem>                     | -7.8 |
| model_17   | 3-Deoxysappanone B                   | <chem>Oc1ccc2c(c1)OCC(C2=O)Cc1ccc(c(c1)O)O</chem>                       | -7.8 |
| model_218  | Anhydrotuberosin                     | <chem>Oc1ccc2c(c1)OCc1c2oc2c1cc1c(c2)OC(C=C1)(C)C</chem>                | -7.8 |
| model_266  | 7-O-Methyleriodictyol                | <chem>COc1cc2OC(CC(=O)c2c(c1)O)c1ccc(c(c1)O)O</chem>                    | -7.8 |
| model_280  | Scillascillin                        | <chem>Oc1cc(O)c2c(c1)OCC1(C2=O)Cc2c1cc1c(c2)OCO1</chem>                 | -7.8 |
| model_304  | Isobonducellin                       | <chem>COc1ccc(cc1)C=C1COc2c(C1=O)ccc(c2)O</chem>                        | -7.8 |
| model_726  | Demethylvestitol                     | <chem>Oc1ccc2c(c1)OCC(C2)c1ccc(cc1O)O</chem>                            | -7.8 |
| model_768  | Coccineone B                         | <chem>Oc1cc(O)c2c(c1)oc1c(c2=O)c2ccccc2OC1O</chem>                      | -7.8 |
| model_788  | 4'-Hydroxyflavanone                  | <chem>Oc1ccc(cc1)C1CC(=O)c2c(O1)cccc2</chem>                            | -7.8 |
| model_833  | Plathymenin                          | <chem>O=C1CC(Oc2c1cc(O)c(c2)O)c1ccc(c(c1)O)O</chem>                     | -7.8 |
| model_834  | Garbanzol                            | <chem>Oc1ccc(cc1)C1Oc2cc(O)ccc2C(=O)C1O</chem>                          | -7.8 |
| model_87   | Eriodictyol                          | <chem>Oc1cc2OC(CC(=O)c2c(c1)O)c1ccc(c(c1)O)O</chem>                     | -7.8 |
| model_1036 | Glabrone                             | <chem>Oc1ccc2c(c1)occ(c2=O)c1ccc2c(c1O)C=CC(O2)(C)C</chem>              | -7.7 |
| model_1062 | Licoflavone B                        | <chem>CC(=CCc1cc2c(=O)cc(oc2cc1O)c1ccc(c(c1)CC=C(C)C)O)C</chem>         | -7.7 |
| model_121  | Morin                                | <chem>Oc1ccc(c(c1)O)c1oc2cc(O)cc(c2c(=O)c1O)O</chem>                    | -7.7 |
| model_167  | Sakuranetin                          | <chem>COc1cc2OC(CC(=O)c2c(c1)O)c1ccc(cc1)O</chem>                       | -7.7 |
| model_188  | Alpinumisoflavone                    | <chem>Oc1ccc(cc1)c1coc2c(c1=O)c(O)c1c(c2)OC(C=C1)(C)C</chem>            | -7.7 |
| model_206  | 7,4'-Dihydroxy-3'-prenylflavan       | <chem>CC(=CCc1cc(ccc1O)C1CCc2c(O1)cc(cc2)O)C</chem>                     | -7.7 |
| model_231  | Taxifolin                            | <chem>Oc1cc2OC(c3ccc(c(c3)O)O)C(C(=O)c2c(c1)O)O</chem>                  | -7.7 |
| model_239  | Naringenin                           | <chem>Oc1ccc(cc1)C1CC(=O)c2c(O1)cc(cc2O)O</chem>                        | -7.7 |
| model_253  | Luteolin                             | <chem>Oc1cc(O)c2c(c1)oc(cc2=O)c1ccc(c(c1)O)O</chem>                     | -7.7 |

|           |                                         |                                                                      |      |
|-----------|-----------------------------------------|----------------------------------------------------------------------|------|
| model_292 | Steppogenin                             | <chem>Oc1ccc(c(c1)O)C1CC(=O)c2c(O1)cc(cc2O)O</chem>                  | -7.7 |
| model_388 | Derrone                                 | <chem>Oc1ccc(cc1)c1coc2c(c1=O)c(O)cc1c2C=CC(O1)(C)C</chem>           | -7.7 |
| model_411 | 7,3',4'-Trihydroxyflavone               | <chem>Oc1ccc(cc1)c1oc2cc(O)ccc2c(=O)c1O</chem>                       | -7.7 |
| model_578 | Euchrenone A10                          | <chem>CC(=CCc1c(O)cc(c2c1OC(CC2=O)c1ccc2c(c1)C=CC(O2)(C)C)O)C</chem> | -7.7 |
| model_626 | Osajin                                  | <chem>CC(=CCc1c2OC(C)(C)C=Cc2c2c(c1O)c(=O)c(co2)c1ccc(cc1)O)C</chem> | -7.7 |
| model_644 | Atalantoflavone                         | <chem>Oc1ccc(cc1)c1cc(=O)c2c(o1)c1C=CC(Oc1cc2O)(C)C</chem>           | -7.7 |
| model_697 | 6-Aldehydoisooophiopogonanone A         | <chem>O=Cc1c(O)c2C(=O)C(COc2c(c1O)C)Cc1ccc2c(c1)OCO2</chem>          | -7.7 |
| model_773 | Isookanin                               | <chem>O=C1CC(Oc2c1ccc(c2O)O)c1ccc(c(c1)O)O</chem>                    | -7.7 |
| model_796 | Ophiopogonanone C                       | <chem>O=Cc1c2OCC(C(=O)c2c(c(c1O)C)O)Cc1ccc2c(c1)OCO2</chem>          | -7.7 |
| model_971 | Shuterin                                | <chem>CC(=CCc1c(O)cc2c(c1O)C(=O)C(C(O2)c1ccc(cc1)O)O)C</chem>        | -7.7 |
| model_975 | Hyperxanthone E                         | <chem>Oc1cc(O)c2c(c1)oc1c(c2=O)c2CCC(Oc2c(c1)O)(C)C</chem>           | -7.7 |
| model_13  | 7,3',4'-Trihydroxy-3-benzyl-2H-chromene | <chem>Oc1ccc2c(c1)OCC(=C2)Cc1ccc(c(c1)O)O</chem>                     | -7.6 |
| model_130 | Hydroxygenkwanin                        | <chem>COc1cc(O)c2c(c1)oc(cc2=O)c1ccc(c(c1)O)O</chem>                 | -7.6 |
| model_222 | Genkwanin                               | <chem>COc1cc(O)c2c(c1)oc(cc2=O)c1ccc(cc1)O</chem>                    | -7.6 |
| model_23  | Quercetin                               | <chem>Oc1cc(O)c2c(c1)oc(c(c2=O)O)c1ccc(c(c1)O)O</chem>               | -7.6 |
| model_233 | Aromadendrin                            | <chem>Oc1ccc(cc1)C1Oc2cc(O)cc(c2C(=O)C1O)O</chem>                    | -7.6 |
| model_242 | Hydrangenol                             | <chem>Oc1ccc(cc1)C1OC(=O)c2c(C1)cccc2O</chem>                        | -7.6 |
| model_267 | Kaempferol                              | <chem>Oc1ccc(cc1)c1oc2cc(O)cc(c2c(=O)c1O)O</chem>                    | -7.6 |
| model_272 | Apigenin                                | <chem>Oc1ccc(cc1)c1cc(=O)c2c(o1)cc(cc2O)O</chem>                     | -7.6 |
| model_306 | 5-O-Methylnaringenin                    | <chem>COc1cc(O)cc2c1C(=O)CC(O2)c1ccc(cc1)O</chem>                    | -7.6 |
| model_327 | Isowighteone                            | <chem>CC(=CCc1cc(ccc1O)c1coc2c(c1=O)c(O)cc(c2)O)C</chem>             | -7.6 |
| model_340 | Padmatin                                | <chem>COc1cc2OC(c3ccc(c(c3)O)O)C(C(=O)c2c(c1)O)O</chem>              | -7.6 |
| model_382 | Hydroxytuberosone                       | <chem>O=C1C=CC2(C(=C1)OCC1(C2Oc2c1cc1c(c2)OC(C=C1)(C)C)O)O</chem>    | -7.6 |
| model_444 | 6-Prenylnaringenin                      | <chem>CC(=CCc1c(O)cc2c(c1O)C(=O)CC(O2)c1ccc(cc1)O)C</chem>           | -7.6 |
| model_525 | Albanin A                               | <chem>CC(=CCc1c(oc2c(c1=O)c(O)cc(c2)O)c1ccc(cc1O)O)C</chem>          | -7.6 |
| model_526 | beta-Rhamnocitrin                       | <chem>COc1cc(O)c2c(c1)oc(c(c2=O)O)c1ccc(c(c1)O)O</chem>              | -7.6 |
| model_591 | Sanggenol A                             | <chem>CC(=CCc1c(O)ccc(c1O)C1CC(=O)c2c(O1)cc(cc2O)O)CCC=C(C)C</chem>  | -7.6 |
| model_605 | Yukovanol                               | <chem>Oc1ccc(cc1)C1Oc2c(C(=O)C1O)c(O)cc1c2C=CC(O1)(C)C</chem>        | -7.6 |
| model_610 | Dihydrobonducellin                      | <chem>COc1ccc(cc1)CC1COc2c(C1=O)ccc(c2)O</chem>                      | -7.6 |
| model_637 | 2-Hydroxynaringenin                     | <chem>Oc1ccc(cc1)C1(O)CC(=O)c2c(O1)cc(cc2O)O</chem>                  | -7.6 |

|            |                                                     |                                                                        |      |
|------------|-----------------------------------------------------|------------------------------------------------------------------------|------|
| model_668  | Dihydroobovatin                                     | <chem>O=C1CC(Oc2c1c(O)cc1c2CCC(O1)(C)C)c1cccc1</chem>                  | -7.6 |
| model_798  | 6-Aldehydo-isoophiopogonone A                       | <chem>O=Cc1c(O)c(C)c2c(c1O)c(=O)c(o2)Cc1ccc2c(c1)OCO2</chem>           | -7.6 |
| model_856  | 3,9-Dihydroeucomin                                  | <chem>COc1ccc(cc1)CC1COc2c(C1=O)c(O)cc(c2)O</chem>                     | -7.6 |
| model_890  | 4-O-Methylbutein                                    | <chem>COc1ccc(cc1O)C=CC(=O)c1ccc(cc1O)O</chem>                         | -7.6 |
| model_923  | Eucomol                                             | <chem>COc1ccc(cc1)CC1(O)COc2c(C1=O)c(O)cc(c2)O</chem>                  | -7.6 |
| model_973  | Gericudranin E                                      | <chem>Oc1ccc(cc1)Cc1c(O)cc2c(c1O)C(=O)C(C(O2)c1ccc(cc1)O)O</chem>      | -7.6 |
| model_974  | Artocarpesin                                        | <chem>CC(=CCc1c(O)cc2c(c1O)c(=O)cc(o2)c1ccc(cc1O)O)C</chem>            | -7.6 |
| model_988  | 5,7-Dimethoxyluteolin                               | <chem>COc1cc(OC)c2c(c1)oc(cc2=O)c1ccc(c(c1)O)O</chem>                  | -7.6 |
| model_1011 | Azaleatin                                           | <chem>COc1cc(O)cc2c1c(=O)c(c(o2)c1ccc(c(c1)O)O)O</chem>                | -7.5 |
| model_1083 | Tuberosin                                           | <chem>Oc1ccc2c(c1)OCC1(C2Oe2c1cc1c(c2)OC(C=C1)(C)C)O</chem>            | -7.5 |
| model_127  | Bavachinin                                          | <chem>COc1cc2OC(CC(=O)c2cc1CC=C(C)C)c1ccc(cc1)O</chem>                 | -7.5 |
| model_139  | Agrimonolide                                        | <chem>COc1ccc(cc1)CCC1OC(=O)c2c(C1)cc(cc2O)O</chem>                    | -7.5 |
| model_153  | (-)-Epiafzelechin                                   | <chem>Oc1ccc(cc1)C1Oc2cc(O)cc(c2CC1O)O</chem>                          | -7.5 |
| model_210  | Scutellarein                                        | <chem>Oc1ccc(cc1)c1cc(=O)c2c(o1)cc(c(c2O)O)O</chem>                    | -7.5 |
| model_250  | Epicatechin                                         | <chem>Oc1cc2OC(c3ccc(c(c3)O)O)C(Cc2c(c1)O)O</chem>                     | -7.5 |
| model_311  | Morusin                                             | <chem>CC(=CCc1c(o2c(c1=O)c(O)cc1c2C=CC(O1)(C)C)c1ccc(cc1O)O)C</chem>   | -7.5 |
| model_316  | Dihydroalpinumisoflavone                            | <chem>Oc1ccc(cc1)c1coc2c(c1=O)c(O)c1c(c2)OC(CC1)(C)C</chem>            | -7.5 |
| model_320  | 4',5-Dihydroxyflavone                               | <chem>Oc1ccc(cc1)c1cc(=O)c2c(o1)cccc2O</chem>                          | -7.5 |
| model_326  | 4',5,7-Trihydroxy-6-prenylflavone/ 6-Prenylapigenin | <chem>CC(=CCc1c(O)cc2c(c1O)c(=O)cc(o2)c1ccc(cc1)O)C</chem>             | -7.5 |
| model_363  | 6-Methoxynaringenin                                 | <chem>COc1c(O)cc2c(c1O)C(=O)CC(O2)c1ccc(cc1)O</chem>                   | -7.5 |
| model_381  | 8-Isomulberrin hydrate                              | <chem>Oc1ccc(c(c1)O)c1oc2c3CCC(Oc3cc(c2c(=O)c1CCC(O)(C)C)O)(C)C</chem> | -7.5 |
| model_399  | Rhamnocitrin                                        | <chem>COc1cc(O)c2c(c1)oc(c(c2=O)O)c1ccc(cc1)O</chem>                   | -7.5 |
| model_487  | 8-Demethylsideroxylin                               | <chem>COc1cc2oc(cc(=O)c2c(c1C)O)c1ccc(cc1)O</chem>                     | -7.5 |
| model_506  | Isonobavaisoflavone                                 | <chem>Oc1ccc2c(c1)occ(c2=O)c1ccc2c(c1)CCC(O2)(C)C</chem>               | -7.5 |
| model_509  | Erythrinin A                                        | <chem>Oc1ccc(cc1)c1coc2c(c1=O)cc1c(c2)OC(C=C1)(C)C</chem>              | -7.5 |
| model_538  | 6-Hydroxykaempferol                                 | <chem>Oc1ccc(cc1)c1oc2cc(O)c(c(c2c(=O)c1O)O)O</chem>                   | -7.5 |
| model_553  | Cyclomulberrin                                      | <chem>CC(=CCc1c(O)cc(c2c1oc1c3ccc(cc3OC(c1c2=O)C=C(C)C)O)O)C</chem>    | -7.5 |
| model_556  | 5,7-Di-O-methylquercetin                            | <chem>COc1cc(O)c2c(c1)oc(c(c2=O)OC)c1ccc(c(c1)O)O</chem>               | -7.5 |
| model_560  | Kaempferol 5-methyl ether                           | <chem>COc1cc(O)cc2c1c(=O)c(c(o2)c1ccc(cc1)O)O</chem>                   | -7.5 |
| model_563  | Cudraflavanone B                                    | <chem>CC(=CCc1c(O)cc2c(c1O)C(=O)CC(O2)c1ccc(cc1O)O)C</chem>            | -7.5 |
| model_568  | Eriosematin A                                       | <chem>CC(=CCc1c(O)cc(c2c1occc2=O)O)C</chem>                            | -7.5 |

|            |                                |                                                                         |      |
|------------|--------------------------------|-------------------------------------------------------------------------|------|
| model_593  | 6-Methoxyluteolin              | <chem>COc1c(O)cc2c(c1O)c(=O)cc(o2)c1ccc(c(c1)O)O</chem>                 | -7.5 |
| model_603  | Sanggenol L                    | <chem>CC(=CCCC1(C)C=Cc2c(O1)cc(c1c2OC(CC1=O)c1ccc(cc1O)O)O)C</chem>     | -7.5 |
| model_628  | Neorauflavane                  | <chem>COc1c2CC(COc2cc2c1C=CC(O2)(C)C)c1ccc(cc1O)O</chem>                | -7.5 |
| model_643  | Neorauflavene                  | <chem>COc1c2C=C(COc2cc2c1C=CC(O2)(C)C)c1ccc(cc1O)O</chem>               | -7.5 |
| model_656  | 7-O-Methylporiol               | <chem>COc1cc2OC(CC(=O)c2c(c1C)O)c1ccc(cc1)O</chem>                      | -7.5 |
| model_676  | Isokaempferide                 | <chem>COc1c(oc2c(c1=O)c(O)cc(c2)O)c1ccc(cc1)O</chem>                    | -7.5 |
| model_696  | 4',7-Isoflavandiol             | <chem>Oc1ccc(cc1)C1COc2c(C1)ccc(c2)O</chem>                             | -7.5 |
| model_704  | Thevetiaflavone                | <chem>COc1cc(O)cc2c1c(=O)cc(o2)c1ccc(cc1)O</chem>                       | -7.5 |
| model_73   | Thunberginol C                 | <chem>Oc1ccc(cc1)C1OC(=O)c2c(C1)cc(cc2O)O</chem>                        | -7.5 |
| model_76   | 3-O-Methylquercetin            | <chem>COc1c(oc2c(c1=O)c(O)cc(c2)O)c1ccc(c(c1)O)O</chem>                 | -7.5 |
| model_763  | Kuwanon A                      | <chem>CC(=CCc1c(oc2c(c1=O)c(O)cc(c2)O)c1ccc(c2c1OC(C)(C)C=C2)O)C</chem> | -7.5 |
| model_850  | Sophoraisoflavone A            | <chem>Oc1cc(O)c2c(c1)occ(c2=O)c1ccc(c2c1OC(C)(C)C=C2)O</chem>           | -7.5 |
| model_857  | Topazolin                      | <chem>COc1c(oc2c(c1=O)c(O)c(c2)O)CC=C(C)C)c1ccc(cc1)O</chem>            | -7.5 |
| model_9    | 3'-Hydroxy-3,9-dihydroeucomin  | <chem>COc1ccc(cc1O)CC1COc2c(C1=O)c(O)cc(c2)O</chem>                     | -7.5 |
| model_932  | Licoflavonol                   | <chem>CC(=CCc1c(O)cc2c(c1O)c(=O)c(c(o2)c1ccc(cc1)O)O)C</chem>           | -7.5 |
| model_96   | Cyanidin Chloride              | <chem>Oc1cc(O)c2c(c1)[o+](c(c2)O)c1ccc(c(c1)O)O.[Cl-]</chem>            | -7.5 |
| model_969  | Mesopsin                       | <chem>Oc1ccc(cc1)CC1(O)Oc2c(C1=O)c(O)cc(c2)O</chem>                     | -7.5 |
| model_10   | 4-Demethyl-3,9-dihydroeucomin  | <chem>Oc1ccc(cc1)CC1COc2c(C1=O)c(O)cc(c2)O</chem>                       | -7.4 |
| model_1055 | Cochliophilin A                | <chem>O=c1cc(oc2c1c(O)c1c(c2)OCO1)c1cccc1</chem>                        | -7.4 |
| model_211  | 3,4,4',7-Tetrahydroxyflavan    | <chem>Oc1ccc(cc1)C1Oc2cc(O)ccc2C(C1O)O</chem>                           | -7.4 |
| model_219  | Luteone                        | <chem>CC(=CCc1c(O)cc2c(c1O)c(=O)c(co2)c1ccc(cc1O)O)C</chem>             | -7.4 |
| model_263  | Wighteone                      | <chem>CC(=CCc1c(O)cc2c(c1O)c(=O)c(co2)c1ccc(cc1)O)C</chem>              | -7.4 |
| model_397  | Demethoxycapillarisin          | <chem>Oc1ccc(cc1)Oc1cc(=O)c2c(o1)cc(cc2O)O</chem>                       | -7.4 |
| model_426  | Kazinol U                      | <chem>CC(=CCc1c(ccc(c1O)O)C1CCc2c(O1)cc(cc2)O)C</chem>                  | -7.4 |
| model_446  | 6-Geranylaringenin             | <chem>CC(=CCc1c(O)cc2c(c1O)C(=O)CC(O2)c1ccc(cc1)O)CCC=C(C)C</chem>      | -7.4 |
| model_480  | Pelargonidin chloride          | <chem>Oc1ccc(cc1)c1[o+](c2cc(O)cc(c2cc1O)O.[Cl-]</chem>                 | -7.4 |
| model_505  | Neobavaisoflavone              | <chem>CC(=CCc1cc(ccc1O)c1coc2c(c1=O)ccc(c2)O)C</chem>                   | -7.4 |
| model_584  | 7,4'-Dihydroxyhomoisoflavanone | <chem>Oc1ccc(cc1)CC1COc2c(C1=O)ccc(c2)O</chem>                          | -7.4 |
| model_62   | Hispidulin                     | <chem>COc1c(O)cc2c(c1O)c(=O)cc(o2)c1ccc(cc1)O</chem>                    | -7.4 |
| model_625  | Warangalone                    | <chem>CC(=CCc1c2OC(C)(C)C=Cc2c(c2c1occ(c2=O)c1ccc(cc1)O)O)C</chem>      | -7.4 |

|            |                                                 |                                                                         |      |
|------------|-------------------------------------------------|-------------------------------------------------------------------------|------|
| model_641  | Glepidotin B                                    | <chem>CC(=CCc1c(O)cc(c2c1OC(c1ccccc1)C(C2=O)O)O)C</chem>                | -7.4 |
| model_645  | Bidwillol A                                     | <chem>COc1c(ccc(c1CC=C(C)C)O)C1=Cc2c(OC1)cc(cc2)O</chem>                | -7.4 |
| model_665  | Auricularin                                     | <chem>CC(=CCc1c2OC(C)(C)C=Cc2c(c2c1occ(c2=O)c1ccc(c(c1)O)O)O)C</chem>   | -7.4 |
| model_683  | 6-Methyl-7-O-methylaromadendrin                 | <chem>COc1cc2OC(c3ccc(cc3)O)C(C(=O)c2c(c1C)O)O</chem>                   | -7.4 |
| model_715  | 9-O-Methyl-4-hydroxyboeravinone B               | <chem>COc1cc2oc3C(O)Oc4c(c3c(=O)c2c(c1C)O)cccc4O</chem>                 | -7.4 |
| model_757  | Glycyrrhisoflavone                              | <chem>CC(=CCc1cc(cc(c1O)O)c1coc2c(c1=O)c(O)cc(c2)O)C</chem>             | -7.4 |
| model_770  | Boeravinone B                                   | <chem>OC1Oc2ccccc2c2c1oc1cc(O)c(c(c1c2=O)O)C</chem>                     | -7.4 |
| model_797  | Ophiopogonanone E                               | <chem>COc1ccc(c(c1)O)CC1COc2c(C1=O)c(O)c(c(c2OC)O)C</chem>              | -7.4 |
| model_815  | Boeravinone O                                   | <chem>COc1cc(O)c2c(c1)oc1c(c2=O)c2cccc(c2OC1O)O</chem>                  | -7.4 |
| model_981  | Citrusinol                                      | <chem>Oc1ccc(cc1)c1oc2c3C=CC(Oc3cc(c2c(=O)c1O)O)(C)C</chem>             | -7.4 |
| model_1003 | Lupinalbin A                                    | <chem>Oc1ccc2c(c1)oc1c2c(=O)c2c(o1)cc(cc2O)O</chem>                     | -7.3 |
| model_1041 | Karanjin                                        | <chem>COc1c(oc2c(c1=O)ccc1c2ccol)c1ccccc1</chem>                        | -7.3 |
| model_12   | 7-Hydroxy-3-(4-hydroxybenzylidene)chroman-4-one | <chem>Oc1ccc(cc1)C=C1COc2c(C1=O)ccc(c2)O</chem>                         | -7.3 |
| model_183  | Kumatakenin                                     | <chem>COc1c(oc2c(c1=O)c(O)cc(c2)OC)c1ccc(cc1)O</chem>                   | -7.3 |
| model_223  | Dihydorobinetin                                 | <chem>Oc1ccc2c(c1)OC(C(C2=O)O)c1cc(O)c(c(c1)O)O</chem>                  | -7.3 |
| model_224  | Robtin                                          | <chem>Oc1ccc2c(c1)OC(CC2=O)c1cc(O)c(c(c1)O)O</chem>                     | -7.3 |
| model_313  | Morusinol                                       | <chem>Oc1ccc(c(c1)O)c1oc2c3C=CC(Oc3cc(c2c(=O)c1CCC(O)(C)C)O)(C)C</chem> | -7.3 |
| model_356  | Viscidulin I                                    | <chem>Oc1cc(O)c2c(c1)oc(c(c2=O)O)c1c(O)cccc1O</chem>                    | -7.3 |
| model_414  | Eurycarpin A                                    | <chem>CC(=CCc1c(O)ccc(c1O)c1coc2c(c1=O)ccc(c2)O)C</chem>                | -7.3 |
| model_442  | Sappanone A                                     | <chem>Oc1ccc2c(c1)OCC(=Cc1ccc(c(c1)O)O)C2=O</chem>                      | -7.3 |
| model_554  | Cyclocommunol                                   | <chem>CC(=CC1Oc2cc(O)ccc2c2c1c(=O)c1c(o2)cc(cc1O)O)C</chem>             | -7.3 |
| model_577  | 3',5'-Diprenylgenistein                         | <chem>CC(=CCc1cc(cc(c1O)CC=C(C)C)c1coc2c(c1=O)c(O)cc(c2)O)C</chem>      | -7.3 |
| model_582  | 2H-1-Benzopyran-7-yloxy                         | <chem>Oc1ccc2c(c1)OC(CC2=O)c1ccccc1</chem>                              | -7.3 |
| model_640  | 3,6-Dimethoxyapigenin                           | <chem>COc1c(O)cc2c(c1O)c(=O)c(c(o2)c1ccc(cc1)O)OC</chem>                | -7.3 |
| model_642  | Sanggenon N                                     | <chem>CC(=CCCC1(C)C=Cc2c(O1)ccc(c2O)C1CC(=O)c2c(O1)cc(c(c2O)O)C</chem>  | -7.3 |
| model_728  | Boeravinone E                                   | <chem>Oc1ccc2c(c1)OC(c1c2c(=O)c2c(o1)cc(c(c2O)C)O)O</chem>              | -7.3 |
| model_837  | (+/-)-Vestitol                                  | <chem>COc1ccc(c(c1)O)C1COc2c(C1)ccc(c2)O</chem>                         | -7.3 |
| model_848  | Abyssinone V                                    | <chem>CC(=CCc1cc(cc(c1O)CC=C(C)C)C1CC(=O)c2c(O1)cc(cc2O)O)C</chem>      | -7.3 |
| model_886  | Licorisoflavan A                                | <chem>CC(=CCc1c(O)ccc(c1O)c1coc2c(c1=O)c(O)cc(c2)O)C</chem>             | -7.3 |



|            |                                                           |                                                                          |      |
|------------|-----------------------------------------------------------|--------------------------------------------------------------------------|------|
| model_941  | Gancaonin G                                               | <chem>COc1cc2occc(=O)c2c(c1CC=C(C)C)O)c1ccc(cc1)O</chem>                 | -7.3 |
| model_989  | Axillarin                                                 | <chem>COc1c(O)cc2c(c1O)c(=O)c(c(o2)c1ccc(c(c1)O)O)OC</chem>              | -7.3 |
| model_1037 | Glabrol                                                   | <chem>CC(=CCc1cc(ccc1O)C1CC(=O)c2c(O1)c(CC=C(C)C)c(cc2)O)C</chem>        | -7.2 |
| model_1047 | Eriosematin                                               | <chem>CC(=CCc1c2OC(C)(C)C=Cc2c(c2c1occc2=O)O)C</chem>                    | -7.2 |
| model_1079 | Irilone                                                   | <chem>Oc1ccc(cc1)c1coc2c(c1=O)c(O)c1c(c2)OCO1</chem>                     | -7.2 |
| model_11   | Pinocembrin 7-acetate                                     | <chem>CC(=O)Oc1cc2OC(CC(=O)c2c(c1)O)c1ccccc1</chem>                      | -7.2 |
| model_112  | Herbacetin                                                | <chem>Oc1ccc(cc1)c1oc2c(O)c(O)cc(c2c(=O)c1O)O</chem>                     | -7.2 |
| model_141  | Erysubin B                                                | <chem>OCC1(C)C=Cc2c(O1)cc1c(c2O)c(=O)c(co1)c1ccc(cc1)O</chem>            | -7.2 |
| model_156  | 5-Hydroxy-7-methoxy-3-(4-hydroxybenzylidene)chroman-4-one | <chem>COc1cc(O)c2c(c1)OCC(=Cc1ccc(cc1)O)C2=O</chem>                      | -7.2 |
| model_220  | Glabranin                                                 | <chem>CC(=CCc1c(O)cc(c2c1OC(CC2=O)c1ccccc1)O)C</chem>                    | -7.2 |
| model_305  | 3,9-Dihydroxypterocarpan                                  | <chem>Oc1ccc2c(c1)OCC1C2Oc2c1ccc(c2)O</chem>                             | -7.2 |
| model_315  | Erythrinin C                                              | <chem>Oc1ccc(cc1)c1coc2c(c1=O)c(O)c1c(c2)OC(C1)C(O)(C)C</chem>           | -7.2 |
| model_333  | Isomedicarpin                                             | <chem>COc1ccc2c(c1)OC[C@@H]1[C@H]2Oc2c1cccc2</chem>                      | -7.2 |
| model_336  | Lupalbigenin                                              | <chem>CC(=CCc1cc(ccc1O)c1coc2c(c1=O)c(O)c(c(c2)O)CC=C(C)C)C</chem>       | -7.2 |
| model_387  | 2'-Hydroxydaidzein                                        | <chem>Oc1ccc(c(c1)O)c1coc2c(c1=O)ccc(c2)O</chem>                         | -7.2 |
| model_427  | Sulfuretin                                                | <chem>Oc1ccc2c(c1)OC(=Cc1ccc(c(c1)O)O)C2=O</chem>                        | -7.2 |
| model_428  | Honyucitrin                                               | <chem>CC(=CCc1cc(cc(c1O)CC=C(C)C)c1cc(=O)c2c(o1)cc(cc2O)O)C</chem>       | -7.2 |
| model_431  | Barpisoflavone A                                          | <chem>COc1cc(O)cc2c1c(=O)c(co2)c1ccc(cc1O)O</chem>                       | -7.2 |
| model_575  | Cathayanon H                                              | <chem>CC(=CCc1cc(cc(c1O)CC=C(C)C)C1Oc2cc(O)cc(c2C(=O)C1O)O)C</chem>      | -7.2 |
| model_590  | Neocyclomorusin                                           | <chem>Oc1ccc2c(c1)OC(Cc1c2oc2c3C=CC(Oc3cc(c2c1=O)O))(C)C)C(O)(C)C</chem> | -7.2 |
| model_6    | 3,7-O-Diacetylpinobanksin                                 | <chem>CC(=O)Oc1cc(O)c2c(c1)OC(C(C2=O)OC(=O)C)c1ccccc1</chem>             | -7.2 |
| model_633  | 6,8-Diprenylgenistein                                     | <chem>CC(=CCc1c(O)c(CC=C(C)C)c2c(c1O)c(=O)c(co2)c1ccc(cc1)O)C</chem>     | -7.2 |
| model_664  | Syzalterin                                                | <chem>Oc1ccc(cc1)c1cc(=O)c2c(o1)c(C)c(c(c2O)C)O</chem>                   | -7.2 |
| model_838  | Sativan                                                   | <chem>COc1cc(OC)ccc1C1COc2c(C1)ccc(c2)O</chem>                           | -7.2 |
| model_1018 | Odoriflavene                                              | <chem>COc1c(OC)ccc(c1O)C1=Cc2c(OC1)cc(cc2)O</chem>                       | -7.1 |
| model_1029 | Glyasperin C                                              | <chem>COc1c2CC(COc2cc(c1CC=C(C)C)O)c1ccc(cc1O)O</chem>                   | -7.1 |
| model_104  | 3-Hydroxy-5,7-dimethoxy-3',4'-methylenedioxyflavan        | <chem>COc1cc2OC(C(Cc2c(c1)OC)O)c1ccc2c(c1)OCO2</chem>                    | -7.1 |
| model_1042 | Dihydrolicoisoflavone                                     | <chem>CC(=CCc1c(O)ccc(c1O)C1COc2c(C1=O)c(O)cc(c2)O)C</chem>              | -7.1 |

|            |                                             |                                                                       |      |
|------------|---------------------------------------------|-----------------------------------------------------------------------|------|
| model_1092 | Glycinol                                    | <chem>Oc1ccc2c(c1)OCC1(C2Oc2c1ccc(c2)O)O</chem>                       | -7.1 |
| model_140  | Erysubin A                                  | <chem>Oc1ccc(cc1)c1coc2c(c1=O)c(O)c1c(c2)oc(c1)C(O)(C)C</chem>        | -7.1 |
| model_174  | Sideroxylin                                 | <chem>COc1c(C)c2oc(cc(=O)c2c(c1C)O)c1ccc(cc1)O</chem>                 | -7.1 |
| model_21   | 2'-Hydroxygenistein                         | <chem>Oc1ccc(c(c1)O)c1coc2c(c1=O)c(O)cc(c2)O</chem>                   | -7.1 |
| model_236  | Pinostrobin                                 | <chem>COc1cc2OC(CC(=O)c2c(c1)O)c1cccc1</chem>                         | -7.1 |
| model_238  | Chrysin                                     | <chem>Oc1cc(O)c2c(c1)oc(cc2=O)c1cccc1</chem>                          | -7.1 |
| model_249  | Robinetin                                   | <chem>Oc1ccc2c(c1)oc(c(c2=O)O)c1cc(O)c(c(c1)O)O</chem>                | -7.1 |
| model_269  | Tectochrysin                                | <chem>COc1cc(O)c2c(c1)oc(cc2=O)c1cccc1</chem>                         | -7.1 |
| model_290  | Galangin                                    | <chem>Oc1cc(O)c2c(c1)oc(c(c2=O)O)c1cccc1</chem>                       | -7.1 |
| model_317  | alpha-Isowighteone                          | <chem>Oc1ccc(cc1)c1coc2c(c1=O)c1OC(C)(C)CCc1c(c2)O</chem>             | -7.1 |
| model_318  | Cirsimaritin                                | <chem>COc1cc2oc(cc(=O)c2c(c1OC)O)c1ccc(cc1)O</chem>                   | -7.1 |
| model_322  | 5-Hydroxy-7-acetoxyflavone                  | <chem>CC(=O)Oc1cc(O)c2c(c1)oc(cc2=O)c1cccc1</chem>                    | -7.1 |
| model_331  | 2,3-Dehydrokievitone                        | <chem>CC(=CCc1c(O)cc(c2c1occ(c2=O)c1ccc(cc1O)O)O)C</chem>             | -7.1 |
| model_357  | 8-O-Demethyl-7-O-methyl-3,9-dihdropunctatin | <chem>COc1cc(O)c2c(c1O)OCC(C2=O)Cc1ccc(cc1)O</chem>                   | -7.1 |
| model_370  | 5,7-Dihydroxy-2-isopropylchromone           | <chem>Oc1cc(O)c2c(c1)oc(cc2=O)C(C)C</chem>                            | -7.1 |
| model_377  | Isothymusin                                 | <chem>COc1c(O)c2oc(cc(=O)c2c(c1OC)O)c1ccc(cc1)O</chem>                | -7.1 |
| model_504  | Norwogonin                                  | <chem>Oc1cc(O)c2c(c1O)oc(cc2=O)c1cccc1</chem>                         | -7.1 |
| model_592  | Eupatoletin                                 | <chem>COc1cc2oc(c3ccc(c(c3)O)O)c(c(=O)c2c(c1OC)O)O</chem>             | -7.1 |
| model_595  | 7-Hydroxyflavone                            | <chem>Oc1ccc2c(c1)oc(cc2=O)c1cccc1</chem>                             | -7.1 |
| model_658  | Pedalitin                                   | <chem>COc1cc2oc(cc(=O)c2c(c1O)O)c1ccc(c(c1)O)O</chem>                 | -7.1 |
| model_666  | Isoerysenegalensein E                       | <chem>CC(=CCc1c(O)c(CC(C(=C)C)O)c(c2c1occ(c2=O)c1ccc(cc1)O)O)C</chem> | -7.1 |
| model_716  | 1"-Hydroxyerythrinin C                      | <chem>Oc1ccc(cc1)c1coc2c(c1=O)c(O)c1c(c2)OC(C1O)C(O)(C)C</chem>       | -7.1 |
| model_734  | Dihydrobaicalein                            | <chem>O=C1CC(Oc2c1c(O)c(c(c2)O)O)c1cccc1</chem>                       | -7.1 |
| model_775  | 8,3'-Diprenylapigenin                       | <chem>CC(=CCc1cc(ccc1O)c1cc(=O)c2c(c1)c(CC=C(C)C)c(cc2O)O)C</chem>    | -7.1 |
| model_827  | Homoeriodictyol                             | <chem>COc1cc(ccc1O)C1CC(=O)c2c(O1)cc(cc2O)O</chem>                    | -7.1 |
| model_849  | 7,8-Dihydroxyflavone                        | <chem>Oc1ccc2c(c1O)oc(cc2=O)c1cccc1</chem>                            | -7.1 |
| model_859  | Isolupalbigenin                             | <chem>CC(=CCc1cc(ccc1O)c1coc2c(c1=O)c(O)cc(c2CC=C(C)C)O)C</chem>      | -7.1 |
| model_877  | 6-Methylgenistein                           | <chem>Oc1ccc(cc1)c1coc2c(c1=O)c(O)c(c(c2)O)C</chem>                   | -7.1 |
| model_933  | Dehydroglyasperin D                         | <chem>COc1c2C=C(COc2cc(c1CC=C(C)C)OC)c1ccc(cc1O)O</chem>              | -7.1 |
| model_942  | Euchrestaflavanone B                        | <chem>CC(=CCc1cc(c(cc1O)O)C1CC(=O)c2c(O1)c(CC=C(C)C)c(cc2O)O)C</chem> | -7.1 |

|            |                                                                           |                                                                         |      |
|------------|---------------------------------------------------------------------------|-------------------------------------------------------------------------|------|
| model_990  | Eriodictyol 7,3'-dimethyl ether                                           | <chem>COc1cc2OC(CC(=O)c2c(c1)O)c1ccc(c(c1)OC)O</chem>                   | -7.1 |
| model_1020 | Pendulone                                                                 | <chem>COC1=C(OC)C(=O)C=C(C1=O)C1COc2c(C1)ccc(c2)O</chem>                | -7   |
| model_1028 | Glicoricone                                                               | <chem>COc1c(CC=C(C)C)c(O)cc(c1c1coc2c(c1=O)ccc(c2)O)O</chem>            | -7   |
| model_1067 | Kushenol S                                                                | <chem>CC(=CCc1c(O)cc(c2c1OC(CC2=O)c1ccccc1O)O)C</chem>                  | -7   |
| model_14   | Pinocembrin diacetate                                                     | <chem>CC(=O)Oc1cc2OC(CC(=O)c2c(c1)OC(=O)C)c1ccccc1</chem>               | -7   |
| model_148  | Amaranol B                                                                | <chem>COc1c(O)cc(cc1O)CC1(O)Oc2c(C1=O)c(O)cc(c2)O</chem>                | -7   |
| model_176  | Isobavachin                                                               | <chem>CC(=CCc1c(O)ccc2c1OC(CC2=O)c1ccc(cc1)O)C</chem>                   | -7   |
| model_192  | 4'-Demethyleucomin                                                        | <chem>Oc1ccc(cc1)C=C1COc2c(C1=O)c(O)cc(c2)O</chem>                      | -7   |
| model_201  | Oroxylin A                                                                | <chem>COc1c(O)cc2c(c1O)c(=O)cc(o2)c1ccccc1</chem>                       | -7   |
| model_227  | Brazilin/Brasilin                                                         | <chem>Oc1ccc2c(c1)OCC1(C2c2cc(O)c(cc2C1)O)O</chem>                      | -7   |
| model_237  | Pinocembrin                                                               | <chem>Oc1cc2OC(CC(=O)c2c(c1)O)c1ccccc1</chem>                           | -7   |
| model_252  | Baicalein                                                                 | <chem>Oc1cc2oc(cc(=O)c2c(c1O)O)c1ccccc1</chem>                          | -7   |
| model_254  | Chrysoeriol                                                               | <chem>COc1cc(ccc1O)c1cc(=O)c2c(o1)cc(cc2O)O</chem>                      | -7   |
| model_289  | Pinobanksin                                                               | <chem>Oc1cc2OC(c3ccccc3)C(C(=O)c2c(c1)O)O</chem>                        | -7   |
| model_335  | 5-Deoxycajanin                                                            | <chem>COc1ccc2c(c1)occ(c2=O)c1ccc(cc1O)O</chem>                         | -7   |
| model_376  | Leachianone A                                                             | <chem>COc1cc(O)ccc1C1CC(=O)c2c(O1)c(CC(C(=C)C)CC=C(C)C)c(cc2O)O</chem>  | -7   |
| model_418  | 8-Prenylaidzein                                                           | <chem>CC(=CCc1c(O)ccc2c1occ(c2=O)c1ccc(cc1)O)C</chem>                   | -7   |
| model_443  | 8-Prenylnaringenin                                                        | <chem>CC(=CCc1c(O)cc(c2c1OC(CC2=O)c1ccc(cc1)O)O)C</chem>                | -7   |
| model_508  | Corylifol C                                                               | <chem>CC(=CCc1c(O)ccc2c1oc(cc2=O)c1ccc(c(c1)O)O)C</chem>                | -7   |
| model_574  | 5,7-Dimethoxyflavanone                                                    | <chem>COc1cc2OC(CC(=O)c2c(c1)OC)c1ccccc1</chem>                         | -7   |
| model_602  | Izalpinine                                                                | <chem>COc1cc(O)c2c(c1)oc(c(c2=O)O)c1ccccc1</chem>                       | -7   |
| model_613  | Eriosemation                                                              | <chem>CC(=CCc1c(O)c(CC=C(C)C)c2c(c1O)c(=O)cco2)C</chem>                 | -7   |
| model_614  | 4',7-Dihydroxyflavone                                                     | <chem>Oc1ccc2c(c1)oc(cc2=O)c1cc(c(c(c1)C(C)(C)C)O)C(C)(C)C</chem>       | -7   |
| model_627  | Furowanin A                                                               | <chem>CC(=CCc1c2OC(Cc2c(c2c1occ(c2=O)c1ccc(c(c1)O)O)O)C(O)(C)C)C</chem> | -7   |
| model_630  | Dalbergioidin                                                             | <chem>Oc1ccc(c(c1)O)C1COc2c(C1=O)c(O)cc(c2)O</chem>                     | -7   |
| model_638  | 4'-O-Methyllicoflavanone                                                  | <chem>COc1ccc(cc1CC=C(C)C)C1CC(=O)c2c(O1)cc(cc2O)O</chem>               | -7   |
| model_646  | 5,7,4-Trihydroxy-3,6-dimethoxy-3-prenylflavone                            | <chem>COc1c(O)cc2c(c1O)c(=O)c(c(o2)c1ccc(c(c1)CC=C(C)C)O)OC</chem>      | -7   |
| model_77   | Chrysosplenol D                                                           | <chem>COc1c(oc2c(c1=O)c(O)c(c(c2)OC)OC)c1ccc(c(c1)O)O</chem>            | -7   |
| model_801  | 5,7-Dihydroxy-3-(4-hydroxy-3,5-dimethoxybenzyl)-6,8-dimethylchroman-4-one | <chem>COc1cc(CC2COc3c(C2=O)c(O)c(c(c3C)O)C)cc(c1O)OC</chem>             | -7   |
| model_825  | Chrysindimethylether                                                      | <chem>COc1cc(OC)c2c(c1)oc(cc2=O)c1ccccc1</chem>                         | -7   |

|           |                                        |                                                                        |      |
|-----------|----------------------------------------|------------------------------------------------------------------------|------|
| model_828 | Hematoxylin                            | <chem>Oc1cc2CC3(C(c2cc1O)c1ccc(c(c1OC3)O)O)O</chem>                    | -7   |
| model_845 | Cirsiliol                              | <chem>COc1cc2oc(cc(=O)c2c(c1OC)O)c1ccc(c(c1)O)O</chem>                 | -7   |
| model_865 | 7,4'-Dihydroxy-8-methylflavan          | <chem>Oc1ccc(cc1)C1CCc2c(O1)c(C)c(cc2)O</chem>                         | -7   |
| model_983 | Negletein                              | <chem>COc1cc2oc(cc(=O)c2c(c1O)O)c1ccccc1</chem>                        | -7   |
| model_99  | 3',5,5',7-Tetrahydroxyflavanone        | <chem>Oc1cc(O)cc(c1)C1CC(=O)c2c(O1)cc(cc2O)O</chem>                    | -7   |
| model_151 | 5,7-Diacetoxy-8-methoxyflavone         | <chem>COc1c(OC(=O)C)cc(c2c1oc(cc2=O)c1ccccc1)OC(=O)C</chem>            | -6.9 |
| model_179 | Medicarpin                             | <chem>COc1ccc2c(c1)OC1C2COc2c1ccc(c2)O</chem>                          | -6.9 |
| model_200 | Alpinetin                              | <chem>COc1cc(O)cc2c1C(=O)CC(O2)c1ccccc1</chem>                         | -6.9 |
| model_202 | 3'-O-Methylorobol                      | <chem>COc1cc(ccc1O)c1coc2c(c1=O)c(O)cc(c2)O</chem>                     | -6.9 |
| model_226 | Genistein                              | <chem>Oc1ccc(cc1)c1coc2c(c1=O)c(O)cc(c2)O</chem>                       | -6.9 |
| model_234 | Orobol                                 | <chem>Oc1cc(O)c2c(c1)occ(c2=O)c1ccc(c(c1)O)O</chem>                    | -6.9 |
| model_248 | Daidzein                               | <chem>Oc1ccc(cc1)c1coc2c(c1=O)ccc(c2)O</chem>                          | -6.9 |
| model_25  | Blumeatin                              | <chem>COc1cc2OC(CC(=O)c2c(c1)O)c1cc(O)cc(c1)O</chem>                   | -6.9 |
| model_271 | Hesperetin                             | <chem>COc1ccc(cc1O)C1CC(=O)c2c(O1)cc(cc2O)O</chem>                     | -6.9 |
| model_294 | Penduletin                             | <chem>COc1c(oc2c(c1=O)c(O)c(c(c2)OC)OC)c1ccc(cc1)O</chem>              | -6.9 |
| model_321 | 5,7-Diacetoxyflavone                   | <chem>CC(=O)Oc1cc(OC(=O)C)c2c(c1)oc(cc2=O)c1ccccc1</chem>              | -6.9 |
| model_334 | Artocarpin                             | <chem>COc1cc2oc(c3ccc(cc3O)O)c(c(=O)c2c(c1C=CC(C)C)O)CC=C(C)C</chem>   | -6.9 |
| model_34  | 5-Acetoxy-7-hydroxyflavone             | <chem>CC(=O)Oc1cc(O)cc2c1c(=O)cc(o2)c1ccccc1</chem>                    | -6.9 |
| model_372 | Diosmetin                              | <chem>COc1ccc(cc1O)c1cc(=O)c2c(o1)cc(cc2O)O</chem>                     | -6.9 |
| model_375 | 3,4'-Dihydroxy-3,5',7-trimethoxyflavan | <chem>COc1cc2OC(C(Cc2c(c1)OC)O)c1ccc(c(c1)OC)O</chem>                  | -6.9 |
| model_406 | Farrerol                               | <chem>Oc1ccc(cc1)C1CC(=O)c2c(O1)c(C)c(c(c2O)C)O</chem>                 | -6.9 |
| model_434 | Dracorhodin perchlorate                | <chem>[O-][Cl](=O)(=O)=O.COc1c(C)c(O)cc2c1ccc([O+])c1ccccc1</chem>     | -6.9 |
| model_531 | 8-Prenylkaempferol                     | <chem>CC(=CCc1c(O)cc(c2c1oc(c1ccc(cc1)O)c(c2=O)O)O)C</chem>            | -6.9 |
| model_555 | Onysilin                               | <chem>COc1cc2OC(CC(=O)c2c(c1OC)O)c1ccccc1</chem>                       | -6.9 |
| model_557 | Kazinol A                              | <chem>CC(=CCc1c(cc(c(c1O)O)CC=C(C)C)C1CCc2c(O1)cc(cc2O)O)C</chem>      | -6.9 |
| model_571 | Dihydrooroxylin A                      | <chem>COc1c(O)cc2c(c1O)C(=O)CC(O2)c1ccccc1</chem>                      | -6.9 |
| model_580 | Euchrestaflavanone A                   | <chem>CC(=CCc1cc(ccc1O)C1CC(=O)c2c(O1)c(CC=C(C)C)c(cc2O)O)C</chem>     | -6.9 |
| model_599 | Cathayanon I                           | <chem>CC(=CCc1cc(c(c(c1O)CC=C(C)C)O)C1Oc2cc(O)cc(c2C(=O)C1O)O)C</chem> | -6.9 |
| model_617 | Homoferreirin                          | <chem>COc1ccc(c(c1)OC)C1COc2c(C1=O)c(O)cc(c2)O</chem>                  | -6.9 |
| model_631 | 12-Deoxo-12alpha-acetoxyelliptone      | <chem>COc1cc2c(cc1OC)OCC1C2C(OC(=O)C)c2c(O1)c1ccoc1cc2</chem>          | -6.9 |

|            |                                     |                                                                                  |      |
|------------|-------------------------------------|----------------------------------------------------------------------------------|------|
| model_662  | Angophorol                          | <chem>COc1c(C)c2OC(CC(=O)c2c(c1C)O)c1ccc(cc1)O</chem>                            | -6.9 |
| model_667  | Erysenegalensein E                  | <chem>CC(=CCc1c(O)c(CC(C(=C)C)O)c2c(c1O)c(=O)c(co2)c1ccc(c1)O)C</chem>           | -6.9 |
| model_691  | 5,7,4'-Trihydroxy-8-methylflavanone | <chem>Oc1ccc(cc1)C1CC(=O)c2c(O1)c(C)c(cc2O)O</chem>                              | -6.9 |
| model_710  | Lupiwighteone                       | <chem>CC(=CCc1c(O)cc(c2c1occ(c2=O)c1ccc(cc1)O)O)C</chem>                         | -6.9 |
| model_717  | Mirabijalone D                      | <chem>COc1cc2oc3C(O)Oc4c(c3c(=O)c2c(c1C)O)ccc(c4)O</chem>                        | -6.9 |
| model_824  | Mosloflavone                        | <chem>COc1cc2oc(cc(=O)c2c(c1OC)O)c1ccccc1</chem>                                 | -6.9 |
| model_858  | Maackiaflavanone                    | <chem>COc1cc(O)c2c(c1CC=C(C)C)OC(CC2=O)c1cc(CC=C(C)C)c(cc1O)O</chem>             | -6.9 |
| model_943  | Dodovisone A                        | <chem>COc1c(O)cc2c(c1O)c(=O)c(c(o2)c1cc(CC=C(C)C)c2c(c1)CC(C(O2)(C)C)O)OC</chem> | -6.9 |
| model_1010 | Isoformononetin                     | <chem>COc1ccc2c(c1)occ(c2=O)c1ccc(cc1)O</chem>                                   | -6.8 |
| model_182  | Cajanin                             | <chem>COc1cc(O)c2c(c1)occ(c2=O)c1ccc(cc1O)O</chem>                               | -6.8 |
| model_240  | Isosakuranetin                      | <chem>COc1ccc(cc1)C1CC(=O)c2c(O1)cc(cc2O)O</chem>                                | -6.8 |
| model_295  | 4'-Hydroxywogonin                   | <chem>COc1c(O)cc(c2c1oc(cc2=O)c1ccc(cc1)O)O</chem>                               | -6.8 |
| model_314  | Wogonin                             | <chem>COc1c(O)cc(c2c1oc(cc2=O)c1ccccc1)O</chem>                                  | -6.8 |
| model_365  | Prunetin                            | <chem>COc1cc(O)c2c(c1)occ(c2=O)c1ccc(cc1)O</chem>                                | -6.8 |
| model_4    | Noreugenin                          | <chem>Oc1cc(O)c2c(c1)oc(cc2=O)C</chem>                                           | -6.8 |
| model_452  | Peonidin chloride                   | <chem>COc1cc(ccc1O)c1[o+]c2cc(O)cc(c2cc1O)O.[Cl-]</chem>                         | -6.8 |
| model_454  | Petunidin chloride                  | <chem>COc1cc(cc(c1O)O)c1[o+]c2cc(O)cc(c2cc1O)O.[Cl-]</chem>                      | -6.8 |
| model_519  | Licoflavone C                       | <chem>CC(=CCc1c(O)cc(c2c1oc(cc2=O)c1ccc(cc1)O)O)C</chem>                         | -6.8 |
| model_547  | 7,3'-Dihydroxy-5'-methoxyisoflavone | <chem>COc1cc(O)cc(c1)c1coc2c(c1=O)ccc(c2)O</chem>                                | -6.8 |
| model_601  | Galangin 3-methyl ether             | <chem>COc1c(oc2c(c1=O)c(O)cc(c2)O)c1ccccc1</chem>                                | -6.8 |
| model_611  | Sappanol                            | <chem>Oc1ccc2c(c1)OCC(C2O)(O)Cc1ccc(c(c1)O)O</chem>                              | -6.8 |
| model_634  | Lupinol C                           | <chem>CC(=CCc1c(O)cc2c(c1O)C(=O)C1(C(O2)Oc2c1ccc(c2)O)O)C</chem>                 | -6.8 |
| model_655  | Dodoviscin J                        | <chem>COc1cc(cc(c1O)CC=C(C)C)c1oc2cc(O)cc(c2c(=O)c1OC)O</chem>                   | -6.8 |
| model_661  | Phaseollidin hydrate                | <chem>Oc1ccc2c(c1)OCC1C2Oc2c1ccc(c2CCC(O)(C)C)O</chem>                           | -6.8 |
| model_723  | Sophoflavescenol                    | <chem>COc1cc(O)c(c2c1c(=O)c(O)c(o2)c1ccc(cc1)O)CC=C(C)C</chem>                   | -6.8 |
| model_724  | Isoxanthohumol                      | <chem>COc1cc(O)c(c2c1C(=O)CC(O2)c1ccc(cc1)O)CC=C(C)C</chem>                      | -6.8 |
| model_727  | 3'-Methoxydaidzein                  | <chem>COc1cc(ccc1O)c1coc2c(c1=O)ccc(c2)O</chem>                                  | -6.8 |
| model_733  | 6,7,4'-Trihydroxyisoflavone         | <chem>Oc1ccc(cc1)c1coc2c(c1=O)cc(c(c2)O)O</chem>                                 | -6.8 |
| model_752  | Isoanhydroicaritin                  | <chem>COc1cc(O)c2c(c1CC=C(C)C)oc(c(c2=O)O)c1ccc(cc1)O</chem>                     | -6.8 |
| model_823  | Dehydroglyasperin C                 | <chem>COc1c2C=C(COc2cc(c1CC=C(C)C)O)c1ccc(cc1O)O</chem>                          | -6.8 |

|            |                                                                       |                                                                           |      |
|------------|-----------------------------------------------------------------------|---------------------------------------------------------------------------|------|
| model_841  | Licoricone                                                            | <chem>COc1c(CC=C(C)C)c(OC)cc(c1c1coc2c(c1=O)ccc(c2)O)O</chem>             | -6.8 |
| model_860  | Glyasperin D                                                          | <chem>COc1c2CC(CO2cc(c1CC=C(C)C)OC)c1ccc(cc1O)O</chem>                    | -6.8 |
| model_93   | Biochanin A                                                           | <chem>COc1ccc(cc1)c1coc2c(c1=O)c(O)cc(c2)O</chem>                         | -6.8 |
| model_1093 | Norwogonin 5,7,8-trimethyl ether                                      | <chem>COc1cc(OC)c2c(c1OC)oc(cc2=O)c1cccc1</chem>                          | -6.7 |
| model_119  | Tectorigenin                                                          | <chem>COc1c(O)cc2c(c1O)c(=O)c(co2)c1ccc(cc1)O</chem>                      | -6.7 |
| model_155  | Velutin                                                               | <chem>COc1cc(O)c2c(c1)oc(cc2=O)c1ccc(c(c1)OC)O</chem>                     | -6.7 |
| model_198  | Moslosooflavone                                                       | <chem>COc1c(OC)cc(c2c1oc(cc2=O)c1cccc1)O</chem>                           | -6.7 |
| model_205  | Naringenin triacetate                                                 | <chem>CC(=O)Oc1ccc(cc1)C1CC(=O)c2c(O1)cc(cc2OC(=O)C)OC(=O)C</chem>        | -6.7 |
| model_217  | Skullcapflavone I                                                     | <chem>COc1cc(O)c2c(c1OC)oc(cc2=O)c1cccc1O</chem>                          | -6.7 |
| model_232  | Isorhamnetin                                                          | <chem>COc1cc(ccc1O)c1oc2cc(O)cc(c2c(=O)c1O)O</chem>                       | -6.7 |
| model_241  | Acacetin                                                              | <chem>COc1ccc(cc1)c1cc(=O)c2c(o1)cc(cc2O)O</chem>                         | -6.7 |
| model_301  | Isosativan                                                            | <chem>COc1ccc2c(c1)OCC(C2)c1ccc(cc1O)OC</chem>                            | -6.7 |
| model_303  | Tamarixetin                                                           | <chem>COc1ccc(cc1O)c1oc2cc(O)cc(c2c(=O)c1O)O</chem>                       | -6.7 |
| model_329  | Dihydrotamarixetin                                                    | <chem>COc1ccc(cc1O)C1Oc2cc(O)cc(c2C(=O)C1O)O</chem>                       | -6.7 |
| model_33   | Glycitein                                                             | <chem>COc1cc2c(cc1O)occ(c2=O)c1ccc(cc1)O</chem>                           | -6.7 |
| model_330  | Sepinol                                                               | <chem>COc1c(O)cc(cc1O)C1Oc2cc(O)ccc2C(=O)C1O</chem>                       | -6.7 |
| model_341  | 2',5,6',7-Tetrahydroxyflavanone                                       | <chem>Oc1cc2OC(CC(=O)c2c(c1)O)c1c(O)cccc1O</chem>                         | -6.7 |
| model_415  | 7,3'-Dihydroxy-4'-methoxyflavan                                       | <chem>COc1ccc(cc1O)C1CCc2c(O1)cc(cc2)O</chem>                             | -6.7 |
| model_503  | Rivularin                                                             | <chem>COc1cccc(c1c1cc(=O)c2c(o1)c(OC)c(cc2O)OC)O</chem>                   | -6.7 |
| model_522  | Kuwanon E                                                             | <chem>CC(=CCc1cc(c(cc1O)O)C1CC(=O)c2c(O1)cc(cc2O)O)CCC=C(C)C</chem>       | -6.7 |
| model_529  | Kushenol L                                                            | <chem>CC(=CCc1c2OC(c3ccc(cc3O)O)C(C(=O)c2c(c(c1O)CC=C(C)C)O)O)C</chem>    | -6.7 |
| model_551  | (+/-)-Sigmoidin A                                                     | <chem>CC(=CCc1c(cc(c(c1O)O)CC=C(C)C)C1CC(=O)c2c(O1)cc(cc2O)O)C</chem>     | -6.7 |
| model_564  | Kurarinol                                                             | <chem>COc1cc(O)c(c2c1C(=O)CC(O2)c1ccc(cc1O)O)CC(C(=C)C)C CC(O)(C)C</chem> | -6.7 |
| model_620  | Isochandalone                                                         | <chem>CC(=CCc1c(O)cc2c(c1O)c(=O)c(co2)c1ccc2c(c1)C=CC(O2)(C)C)C</chem>    | -6.7 |
| model_650  | Dodoviscin                                                            | <chem>OCC(CCc1cc(ccc1O)c1oc2cc(O)cc(c2c(=O)c1OC)O)C</chem>                | -6.7 |
| model_686  | Dihydrodaidzein                                                       | <chem>Oc1ccc(cc1)C1COc2c(C1=O)ccc(c2)O</chem>                             | -6.7 |
| model_754  | Pratensein                                                            | <chem>COc1ccc(cc1O)c1coc2c(c1=O)c(O)cc(c2)O</chem>                        | -6.7 |
| model_790  | 6-Hydroxywogonin                                                      | <chem>COc1c(O)c(O)c(c2c1oc(cc2=O)c1cccc1)O</chem>                         | -6.7 |
| model_802  | 3-(2,4-Dihydroxybenzyl)-5-hydroxy-7,8-dimethoxy-6-methylchroman-4-one | <chem>COc1c2OCC(C(=O)c2c(c(c1OC)C)O)Cc1ccc(cc1O)O</chem>                  | -6.7 |

|            |                                                                        |                                                                        |      |
|------------|------------------------------------------------------------------------|------------------------------------------------------------------------|------|
| model_822  | Trilepisflavan                                                         | <chem>COc1cc(ccc1OC)C1CCc2c(O1)cc(cc2)O</chem>                         | -6.7 |
| model_972  | Montixanthone                                                          | <chem>COc1cc(O)cc2c1c(=O)c1c(o2)cc(c(c1)O)O</chem>                     | -6.7 |
| model_1034 | 5-Methyl-7-methoxyisoflavone                                           | <chem>COc1cc(C)c2c(c1)occ(c2=O)c1ccccc1</chem>                         | -6.6 |
| model_1064 | Parvisoflavanone                                                       | <chem>COc1c(ccc(c1OC)O)C1COc2c(C1=O)c(O)cc(c2)O</chem>                 | -6.6 |
| model_1070 | 5,7,2',4'-Tetrahydroxy-8,3'-di(gamma,gamma-dimethylallyl)-isoflavanone | <chem>CC(=CCc1c(O)ccc(c1O)C1COc2c(C1=O)c(O)cc(c2CC=C(C)C)O)C</chem>    | -6.6 |
| model_135  | Formononetin                                                           | <chem>COc1ccc(cc1)c1coc2c(c1=O)ccc(c2)O</chem>                         | -6.6 |
| model_177  | 6-Methoxywogonin                                                       | <chem>COc1c(O)c(OC)c2c(c1O)c(=O)cc(o2)c1ccccc1</chem>                  | -6.6 |
| model_185  | Pachypodol                                                             | <chem>COc1cc(O)c2c(c1)oc(c(c2=O)OC)c1ccc(c(c1)OC)O</chem>              | -6.6 |
| model_20   | 5-Hydroxy-7,8-dimethoxyflavanone                                       | <chem>COc1c(OC)cc(c2c1OC(CC2=O)c1ccccc1)O</chem>                       | -6.6 |
| model_207  | Phaseollidin                                                           | <chem>CC(=CCc1c(O)ccc2c1OC1C2COc2c1ccc(c2)O)C</chem>                   | -6.6 |
| model_270  | Tricin                                                                 | <chem>COc1cc(cc(c1O)OC)c1cc(=O)c2c(o1)cc(cc2O)O</chem>                 | -6.6 |
| model_274  | 3-O-Acetylpinobanksin                                                  | <chem>CC(=O)OC1C(Oc2c(C1=O)c(O)cc(c2)O)c1ccccc1</chem>                 | -6.6 |
| model_325  | Trifolirhizin                                                          | <chem>OCC1OC(Oc2ccc3c(c2)OCC2C3Oc3c2cc2c(c3)OCO2)C(C(C1O)O)O</chem>    | -6.6 |
| model_339  | 2',3,5,6',7-Pentahydroxyflavanone                                      | <chem>Oc1cc2OC(c3c(O)cccc3O)C(C(=O)c2c(c1)O)O</chem>                   | -6.6 |
| model_416  | Jaceosidin                                                             | <chem>COc1cc(ccc1O)c1cc(=O)c2c(o1)cc(c(c2O)OC)O</chem>                 | -6.6 |
| model_500  | Viscidulin II                                                          | <chem>COc1cc(O)c2c(c1OC)oc(cc2=O)c1c(O)cccc1O</chem>                   | -6.6 |
| model_528  | Leachianone G                                                          | <chem>CC(=CCc1c(O)cc(c2c1OC(CC2=O)c1ccc(cc1O)O)O)C</chem>              | -6.6 |
| model_546  | Kushenol E                                                             | <chem>CC(=CCc1c2OC(CC(=O)c2c(c(c1O)CC=C(C)C)O)c1ccc(cc1O)O)C</chem>    | -6.6 |
| model_597  | 3'-Deoxy-4-O-methylsappanol                                            | <chem>COC1c2ccc(cc2OCC1(O)Cc1ccc(cc1)O)O</chem>                        | -6.6 |
| model_659  | Derrisisoflavone B                                                     | <chem>CC(=CCc1c(O)cc2c(c1O)c(=O)c(c2)c1ccc(c(c1)CC(C(=C)C)O)O)C</chem> | -6.6 |
| model_8    | 4-O-Methylsappanol                                                     | <chem>COC1c2ccc(cc2OCC1(O)Cc1ccc(c(c1)O)O)O</chem>                     | -6.6 |
| model_831  | 5,7-Dihydroxy-3',4',5'-trimethoxyflavone                               | <chem>COc1c(OC)cc(cc1OC)c1cc(=O)c2c(o1)cc(cc2O)O</chem>                | -6.6 |
| model_136  | Ermanin                                                                | <chem>COc1ccc(cc1)c1oc2cc(O)cc(c2c(=O)c1OC)O</chem>                    | -6.5 |
| model_195  | Anhydroicaritin                                                        | <chem>COc1ccc(cc1)c1oc2c3CCC(Oc3cc(c2c(=O)c1O)O)(C)C</chem>            | -6.5 |
| model_197  | Noricaritin                                                            | <chem>Oc1ccc(cc1)c1oc2c(CCC(O)(C)C)c(O)cc(c2c(=O)c1O)O</chem>          | -6.5 |
| model_209  | Naringenintrimethyl ether                                              | <chem>COc1ccc(cc1)C1CC(=O)c2c(O1)cc(cc2OC)OC</chem>                    | -6.5 |
| model_251  | Kaempferide                                                            | <chem>COc1ccc(cc1)c1oc2cc(O)cc(c2c(=O)c1O)O</chem>                     | -6.5 |
| model_368  | 5-Hydroxy-7-acetoxy-8-methoxyflavone                                   | <chem>COc1c(OC(=O)C)cc(c2c1oc(cc2=O)c1ccccc1)O</chem>                  | -6.5 |
| model_401  | Isopedicin                                                             | <chem>COc1c2OC(CC(=O)c2c(c(c1OC)O)OC)c1ccccc1</chem>                   | -6.5 |

|            |                                                |                                                                           |      |
|------------|------------------------------------------------|---------------------------------------------------------------------------|------|
| model_438  | Kurarinone                                     | <chem>COc1cc(O)c(c2c1C(=O)CC(O2)c1ccc(cc1O)O)CC(C(=C)C)C=C(C)C</chem>     | -6.5 |
| model_440  | Sophoraflavanone G                             | <chem>CC(=CCC(C(=C)C)Cc1c(O)cc(c2c1OC(CC2=O)c1ccc(cc1O)O)O)C</chem>       | -6.5 |
| model_445  | 6,8-Diprenylnaringenin                         | <chem>CC(=CCc1c2OC(CC(=O)c2c(c(c1O)CC=C(C)C)O)c1ccc(cc1)O)C</chem>        | -6.5 |
| model_45   | Calycosin                                      | <chem>COc1ccc(cc1O)c1coc2c(c1=O)ccc(c2)O</chem>                           | -6.5 |
| model_453  | Malvidin chloride                              | <chem>COc1cc(cc(c1O)OC)c1[o+]c2cc(O)cc(c2cc1O)O.[Cl-]</chem>              | -6.5 |
| model_502  | Skullcapflavone II                             | <chem>COc1cccc(c1c1cc(=O)c2c(o1)c(OC)c(c(c2O)OC)OC)O</chem>               | -6.5 |
| model_558  | Isothymonin                                    | <chem>COc1cc(ccc1O)c1cc(=O)c2c(o1)c(O)c(c(c2O)OC)OC</chem>                | -6.5 |
| model_649  | Aliarin                                        | <chem>COc1ccc(cc1CCC(O)C)c1oc2cc(O)c(c(c2c(=O)c1OC)O)OC</chem>            | -6.5 |
| model_813  | Sideritoflavone                                | <chem>COc1c(OC)c(OC)c(c2c1oc(cc2=O)c1ccc(c(c1)O)O)O</chem>                | -6.5 |
| model_820  | Hesperetin-7-methyl ether                      | <chem>COc1cc2OC(CC(=O)c2c(c1)O)c1ccc(c(c1)O)OC</chem>                     | -6.5 |
| model_868  | 2',4'-Dihydroxy-7-methoxy-8-prenylflavan       | <chem>COc1ccc2c(c1CC=C(C)C)OC(CC2)c1ccc(cc1O)O</chem>                     | -6.5 |
| model_920  | Piloin                                         | <chem>COc1cc(O)c2c(c1)oc(cc2=O)c1ccc(c(c1)O)OC</chem>                     | -6.5 |
| model_979  | Trimethylapigenin                              | <chem>COc1ccc(cc1)c1cc(=O)c2c(o1)cc(cc2OC)OC</chem>                       | -6.5 |
| model_1    | Pectolinarigenin                               | <chem>COc1ccc(cc1)c1cc(=O)c2c(o1)cc(c(c2O)OC)O</chem>                     | -6.4 |
| model_1030 | Gancaonin N                                    | <chem>COc1ccc(c(c1)O)c1coc2c(c1=O)c(O)c(c(c2O)CC=C(C)C</chem>             | -6.4 |
| model_16   | 2',5,7-Trihydroxy-8-methoxyflavanone           | <chem>COc1c(O)cc(c2c1OC(CC2=O)c1cccc1O)O</chem>                           | -6.4 |
| model_175  | Eucalyptin                                     | <chem>COc1ccc(cc1)c1cc(=O)c2c(o1)c(C)c(c(c2O)C)OC</chem>                  | -6.4 |
| model_184  | Quercetin 3,4'-dimethyl ether                  | <chem>COc1ccc(cc1O)c1oc2cc(O)cc(c2c(=O)c1OC)O</chem>                      | -6.4 |
| model_2    | 7-Hydroxy-2',5,8-trimethoxyflavanone           | <chem>COc1cccc1C1CC(=O)c2c(O1)c(OC)c(cc2OC)O</chem>                       | -6.4 |
| model_22   | 3',4',7-Trimethoxyflavan                       | <chem>COc1cc(cc(c1OC)O)C1CCc2c(O1)c(O)c(cc2)OC</chem>                     | -6.4 |
| model_281  | Ombuin                                         | <chem>COc1cc(O)c2c(c1)oc(c(c2=O)O)c1ccc(c(c1)O)OC</chem>                  | -6.4 |
| model_288  | 7-Hydroxy-5,8-dimethoxyflavanone               | <chem>COc1c(O)cc(c2c1OC(CC2=O)c1cccc1)OC</chem>                           | -6.4 |
| model_344  | Visnagin                                       | <chem>COc1c2c(=O)cc(oc2cc2c1cco2)C</chem>                                 | -6.4 |
| model_424  | 5,7,3'-Trihydroxy-4'-methoxy-8-prenylflavanone | <chem>COc1ccc(cc1O)C1CC(=O)c2c(O1)c(CC=C(C)C)c(cc2O)O</chem>              | -6.4 |
| model_435  | Kushenol A                                     | <chem>CC(=CCC(C(=C)C)Cc1c(O)cc(c2c1OC(CC2=O)c1cccc1O)O)C</chem>           | -6.4 |
| model_436  | Kushenol I                                     | <chem>COc1cc(O)c(c2c1C(=O)C(O)C(O2)c1ccc(cc1O)O)CC(C(=C)C)CC=C(C)C</chem> | -6.4 |
| model_5    | Jaceidin                                       | <chem>COc1cc(ccc1O)c1oc2cc(O)c(c(c2c(=O)c1OC)O)OC</chem>                  | -6.4 |
| model_570  | 4'-Hydroxy-7-methoxyflavan                     | <chem>COc1ccc2c(c1)OC(CC2)c1ccc(cc1)O</chem>                              | -6.4 |
| model_616  | Gancaonin M                                    | <chem>COc1ccc(cc1)c1coc2c(c1=O)c(O)cc(c2CC=C(C)C)O</chem>                 | -6.4 |



|            |                                                         |                                                                     |      |
|------------|---------------------------------------------------------|---------------------------------------------------------------------|------|
| model_708  | 2',7-Dihydroxy-5,8-dimethoxyflavanone                   | <chem>COc1c(O)cc(c2c1OC(CC=O)c1cccc1O)OC</chem>                     | -6.4 |
| model_713  | Ayanin                                                  | <chem>COc1cc(O)c2c(c1)oc(c(=O)OC)c1ccc(c(c1)O)OC</chem>             | -6.4 |
| model_743  | 6-Demethoxytangeretin                                   | <chem>COc1ccc(cc1)c1cc(=O)c2c(o1)c(OC)c(cc2OC)OC</chem>             | -6.4 |
| model_772  | Toxicarolisoflavone                                     | <chem>COc1cc(OC)c(cc1c1coc2c(c1=O)c(O)cc1c2C=CC(O1)(C)C)OC</chem>   | -6.4 |
| model_809  | Ladanein                                                | <chem>COc1ccc(cc1)c1cc(=O)c2c(o1)cc(c(c2O)O)OC</chem>               | -6.4 |
| model_811  | Licoricidin                                             | <chem>COc1c2CC(COc2cc(c1CC=C(C)C)O)c1ccc(c(c1O)CC=C(C)C)O</chem>    | -6.4 |
| model_89   | 3,5-Dihydroxy-4',7-dimethoxyflavone                     | <chem>COc1ccc(cc1)c1oc2cc(OC)cc(c2c(=O)c1O)O</chem>                 | -6.4 |
| model_934  | 7-O-Methyleucomol                                       | <chem>COc1ccc(cc1)CC1(O)COc2c(C1=O)c(O)cc(c2)OC</chem>              | -6.4 |
| model_1053 | Daidzein diacetate                                      | <chem>CC(=O)Oc1ccc(cc1)c1coc2c(c1=O)ccc(c2)OC(=O)C</chem>           | -6.3 |
| model_149  | Desmethoxycentaureidin                                  | <chem>COc1ccc(cc1O)c1cc(=O)c2c(o1)cc(c(c2O)OC)O</chem>              | -6.3 |
| model_166  | 4',7-Di-O-methylnaringenin                              | <chem>COc1ccc(cc1)C1CC(=O)c2c(O1)cc(cc2O)OC</chem>                  | -6.3 |
| model_173  | 5,7,3'-Trihydroxy-6,4',5'-trimethoxyflavanone           | <chem>COc1c(O)cc(cc1OC)C1CC(=O)c2c(O1)cc(c(c2O)OC)O</chem>          | -6.3 |
| model_208  | Cimifugin                                               | <chem>COc1c2CC(Oc2cc2c1c(=O)cc(o2)CO)C(O)(C)C</chem>                | -6.3 |
| model_265  | 7,4'-Di-O-methylapigenin / Apigenin 7,4'-dimethyl ether | <chem>COc1ccc(cc1)c1cc(=O)c2c(o1)cc(cc2O)OC</chem>                  | -6.3 |
| model_273  | 2-Hydroxy-7-O-methylscillascillin                       | <chem>COc1cc(O)c2c(c1)OC(C1(C2=O)Cc2c1cc1c(c2)OCO1)O</chem>         | -6.3 |
| model_302  | Chrysosplenetin                                         | <chem>COc1cc2oc(c3ccc(c(c3)OC)O)c(c(=O)c2c(c1OC)O)OC</chem>         | -6.3 |
| model_354  | 8-Methoxybonducellin                                    | <chem>COc1ccc(cc1)C=C1COc2c(C1=O)ccc(c2OC)O</chem>                  | -6.3 |
| model_355  | Viscidulin III/ Ganhuangenin                            | <chem>COc1c(O)ccc(c1c1cc(=O)c2c(o1)c(OC)c(cc2O)O)O</chem>           | -6.3 |
| model_405  | 5,7-Dihydroxychromone                                   | <chem>Oc1cc(O)c2c(c1)occc2=O</chem>                                 | -6.3 |
| model_420  | 4-Hydroxycoumarin                                       | <chem>O=c1cc(O)c2c(o1)cccc2</chem>                                  | -6.3 |
| model_421  | Centaureidin                                            | <chem>COc1ccc(cc1O)c1oc2cc(O)c(c(c2c(=O)c1OC)O)OC</chem>            | -6.3 |
| model_501  | 5,2',5'-Trihydroxy-6,7,8-trimethoxyflavone              | <chem>COc1c(OC)c(OC)c(c2c1oc(cc2=O)c1cc(O)ccc1O)O</chem>            | -6.3 |
| model_521  | Tephrosin                                               | <chem>COc1cc2c(cc1OC)OCC1C2(O)C(=O)c2c(O1)c1C=CC(Oc1cc2)(C)C</chem> | -6.3 |
| model_527  | Kushenol W                                              | <chem>COc1cc(C2CC(=O)c3c(O2)c(CC=C(C)C)c(cc3O)O)c(cc1O)O</chem>     | -6.3 |
| model_541  | 8-Methoxykaempferol / Sexangularetin                    | <chem>COc1c(O)cc(c2c1oc(c1ccc(cc1)O)c(c2=O)O)O</chem>               | -6.3 |
| model_705  | Tsugafolin                                              | <chem>COc1ccc(cc1)C1CC(=O)c2c(O1)cc(cc2OC)O</chem>                  | -6.3 |
| model_729  | Kaempferol 3,7,4'-trimethylether                        | <chem>COc1ccc(cc1)c1oc2cc(OC)cc(c2c(=O)c1OC)O</chem>                | -6.3 |
| model_745  | 5,7,3'-Trihydroxy-6,4',5'-trimethoxyflavone             | <chem>COc1c(O)cc(cc1OC)c1cc(=O)c2c(o1)cc(c(c2O)OC)O</chem>          | -6.3 |
| model_771  | Alpha-Toxicarol                                         | <chem>COc1cc2OCC3C(c2cc1OC)C(=O)c1c(O3)c2C=CC(Oc2cc1O)(C)C</chem>   | -6.3 |

|            |                                              |                                                                          |      |
|------------|----------------------------------------------|--------------------------------------------------------------------------|------|
| model_117  | Naringenin-4',7-diacetate                    | <chem>CC(=O)Oc1ccc(cc1)C1CC(=O)c2c(O1)cc(cc2O)OC(=O)C</chem>             | -6.2 |
| model_165  | 5-Hydroxy-3',4',7-trimethoxyflavone          | <chem>COc1cc(O)c2c(c1)oc(cc2=O)c1ccc(c(c1)OC)OC</chem>                   | -6.2 |
| model_225  | Norkhellol                                   | <chem>OCc1cc(=O)c2c(o1)cc1c(c2O)cco1</chem>                              | -6.2 |
| model_255  | Angelicaicain                                | <chem>OCc1cc(=O)c2c(o1)cc1c(c2O)CC(O1)C(O)(C)C</chem>                    | -6.2 |
| model_28   | 3',5,5',7-Tetrahydroxy-4',6-dimethoxyflavone | <chem>COc1c(O)cc(cc1O)c1cc(=O)c2c(o1)cc(c(c2O)OC)O</chem>                | -6.2 |
| model_293  | 8-Demethyleucalyptin                         | <chem>COc1ccc(cc1)c1cc(=O)c2c(o1)cc(c(c2O)C)OC</chem>                    | -6.2 |
| model_337  | 3-Hydroxy-4',5,7-trimethoxyflavanone         | <chem>COc1ccc(cc1)C1Oe2cc(OC)cc(c2C(=O)C1O)OC</chem>                     | -6.2 |
| model_338  | Blumeatin B                                  | <chem>COc1cc2OC(c3ccc(c(c3)O)OC)C(C(=O)c2c(c1)O)O</chem>                 | -6.2 |
| model_366  | Eupatilin                                    | <chem>COc1cc(ccc1OC)c1cc(=O)c2c(o1)cc(c(c2O)OC)O</chem>                  | -6.2 |
| model_404  | Capillarisin                                 | <chem>COc1c(O)cc2c(c1O)c(=O)cc(o2)Oc1ccc(cc1)O</chem>                    | -6.2 |
| model_439  | 2'-Methoxykurarinone                         | <chem>COc1cc(O)c(c2c1C(=O)CC(O2)c1ccc(cc1OC)O)CC(C(=C)C)CC=C(C)C</chem>  | -6.2 |
| model_755  | Isosinensetin                                | <chem>COc1cc(ccc1OC)c1cc(=O)c2c(o1)c(OC)c(cc2OC)OC</chem>                | -6.2 |
| model_980  | Tetramethylkaempferol                        | <chem>COc1ccc(cc1)c1oc2cc(OC)cc(c2c(=O)c1OC)OC</chem>                    | -6.2 |
| model_1031 | 4"-methyloxy-Daidzin                         | <chem>OCC1OC(Oc2ccc3c(c2)occ(c3=O)c2ccc(cc2)O)C(C(C1OC)O)O</chem>        | -6.1 |
| model_398  | Homopterocarpin                              | <chem>COc1ccc2c(c1)OCC1C2Oc2c1ccc(c2)OC</chem>                           | -6.1 |
| model_419  | Cirsilineol                                  | <chem>COc1cc2oc(cc(=O)c2c(c1OC)O)c1ccc(c(c1)OC)O</chem>                  | -6.1 |
| model_532  | Aformosine                                   | <chem>COc1ccc(cc1)c1coc2c(c1=O)cc(c(c2)O)OC</chem>                       | -6.1 |
| model_573  | Sophoraflavanone C                           | <chem>CC(=CCc1c(O)cc(c2c1OC(CC2=O)c1ccc(cc1O)O)O)CCC=C(C)C</chem>        | -6.1 |
| model_632  | Deguelin                                     | <chem>COc1cc2c(cc1OC)OCC1C2C(=O)c2c(O1)c1C=CC(Oc1cc2)(C)C</chem>         | -6.1 |
| model_657  | 5,7,4'-Tri-O-methylcatechin                  | <chem>COc1cc2OC(c3ccc(c(c3)O)OC)C(Cc2c(c1)OC)O</chem>                    | -6.1 |
| model_880  | Pierreione B                                 | <chem>COc1cc(ccc1OCC(C(O)(C)C)O)c1coc2c(c1=O)cc1c(c2)OC(C=C1)(C)C</chem> | -6.1 |
| model_935  | 7,3'-Di-O-methylorobol                       | <chem>COc1cc(O)c2c(c1)occ(c2=O)c1ccc(c(c1)OC)O</chem>                    | -6.1 |
| model_1017 | Colutehydroquinone                           | <chem>COc1ccc2c(c1)OCC(C2)c1cc(O)c(c(c1O)OC)OC</chem>                    | -6   |
| model_1024 | 4',5,6,7-Tetramethoxyflavone                 | <chem>COc1ccc(cc1)c1cc(=O)c2c(o1)cc(c(c2OC)OC)OC</chem>                  | -6   |
| model_1045 | Irisolidone                                  | <chem>COc1ccc(cc1)c1coc2c(c1=O)c(O)c(c(c2)O)OC</chem>                    | -6   |
| model_1085 | Hamaudol                                     | <chem>Cc1cc(=O)c2c(o1)cc1c(c2O)CC(C(O1)(C)C)O</chem>                     | -6   |
| model_15   | 3',5-Dihydroxy-4',5',6,7-tetramethoxyflavone | <chem>COc1c(O)cc(cc1OC)c1cc(=O)c2c(o1)cc(c(c2O)OC)OC</chem>              | -6   |
| model_190  | Prudomestin                                  | <chem>COc1ccc(cc1)c1oc2c(OC)c(O)cc(c2c(=O)c1O)O</chem>                   | -6   |
| model_196  | Icaritin                                     | <chem>COc1ccc(cc1)c1oc2c(CC=C(C)C)c(O)cc(c2c(=O)c1O)O</chem>             | -6   |

|            |                                                                   |                                                                          |      |
|------------|-------------------------------------------------------------------|--------------------------------------------------------------------------|------|
| model_342  | 2',5,6',7-Tetraacetoxyflavanone                                   | <chem>CC(=O)Oc1cc(OC(=O)C)c2c(c1)OC(CC2=O)c1c(ccc1OC(=O)C)OC(=O)C</chem> | -6   |
| model_345  | 4',5-Dihydroxy-3',5',6,7-tetramethoxyflavone                      | <chem>COc1cc2oc(cc(=O)c2c(c1OC)O)c1cc(OC)c(c(c1)OC)O</chem>              | -6   |
| model_348  | Eupatorin                                                         | <chem>COc1cc2oc(cc(=O)c2c(c1OC)O)c1ccc(c(c1)O)OC</chem>                  | -6   |
| model_383  | Isolicoflavonol                                                   | <chem>CC(=CCc1cc(ccc1O)c1oc2cc(O)cc(c2c(=O)c1O)O)C</chem>                | -6   |
| model_50   | Eucalyptin acetate                                                | <chem>COc1c(C)c2oc(cc(=O)c2c(c1C)OC(=O)C)c1ccc(cc1)OC</chem>             | -6   |
| model_507  | Corylifol A                                                       | <chem>CC(=CCc1cc(ccc1O)c1coc2c(c1=O)ccc(c2)O)CCC=C(C)C</chem>            | -6   |
| model_544  | Limocitrin                                                        | <chem>COc1cc(ccc1O)c1oc2c(OC)c(O)cc(c2c(=O)c1O)O</chem>                  | -6   |
| model_622  | Dehydrodeguelin                                                   | <chem>COc1cc2c(cc1OC)OCc1c2c(=O)c2c(o1)c1C=CC(Oc1cc2)(C)C</chem>         | -6   |
| model_1013 | 7-O-Methylbiochanin A                                             | <chem>COc1ccc(cc1)c1coc2c(c1=O)c(O)cc(c2)OC</chem>                       | -5.9 |
| model_123  | Epimedin A                                                        | <chem>COc1ccc(cc1)c1cc(=O)c2c(o1)cc(c(c2O)OC)OC</chem>                   | -5.9 |
| model_328  | 6-Acetyl-2,2-dimethylchroman-4-one                                | <chem>O=C1CC(C)(C)Oc2c1cc(cc2)C(=O)C</chem>                              | -5.9 |
| model_736  | Irigenin                                                          | <chem>COc1cc(cc(c1OC)O)c1coc2c(c1=O)c(O)c(c(c2O)OC)OC</chem>             | -5.9 |
| model_79   | Sinensetin                                                        | <chem>COc1ccc(cc1OC)c1cc(=O)c2c(o1)cc(c(c2OC)OC)OC</chem>                | -5.9 |
| model_1051 | 3'-Demethylnobiletin                                              | <chem>COc1ccc(cc1O)c1cc(=O)c2c(o1)c(OC)c(c(c2OC)OC)OC</chem>             | -5.8 |
| model_137  | 2',4',5'-Trimethoxy-2'',2''-dimethylpyrano[5'',6'':6,7]isoflavone | <chem>COc1cc(OC)c(cc1c1coc2c(c1=O)cc1c(c2)OC(C=C1)(C)C)O</chem>          | -5.8 |
| model_647  | 11-Hydroxytephrosin                                               | <chem>COc1cc2OCC3C(c2cc1OC)(O)C(=O)c1c(O3)c2C=CC(Oc2cc1O)(C)C</chem>     | -5.8 |
| model_740  | Gardenin B                                                        | <chem>COc1ccc(cc1)c1cc(=O)c2c(o1)c(OC)c(c(c2O)OC)OC</chem>               | -5.8 |
| model_836  | Alpinumisoflavone acetate                                         | <chem>CC(=O)Oc1ccc(cc1)c1coc2c(c1=O)c(O)c1c(c2)OC(C=C1)(C)C</chem>       | -5.8 |
| model_899  | Daidzein dimethyl ether                                           | <chem>COc1ccc(cc1)c1coc2c(c1=O)ccc(c2)OC</chem>                          | -5.8 |
| model_915  | Corymbosin                                                        | <chem>COc1cc(O)c2c(c1)oc(cc2=O)c1cc(OC)c(c(c1)OC)OC</chem>               | -5.8 |
| model_94   | 5,7-Dihydroxy-3,4',8-trimethoxyflavone                            | <chem>COc1ccc(cc1)c1oc2c(OC)c(O)cc(c2c(=O)c1OC)O</chem>                  | -5.8 |
| model_114  | Irisfloreutin                                                     | <chem>COc1cc(cc(c1OC)OC)c1coc2c(c1=O)c(OC)c1c(c2)OCO1</chem>             | -5.7 |
| model_264  | 5,7-Diacetoxy-3,4',8-trimethoxyflavone                            | <chem>COc1ccc(cc1)c1oc2c(OC)c(OC(=O)C)cc(c2c(=O)c1OC)OC(=O)C</chem>      | -5.7 |
| model_389  | Tangeretin                                                        | <chem>COc1ccc(cc1)c1cc(=O)c2c(o1)c(OC)c(c(c2OC)OC)OC</chem>              | -5.7 |
| model_41   | Ononin                                                            | <chem>OCC1OC(Oc2ccc3c(c2)occ(c3=O)c2ccc(cc2)OC)C(C(C1O)O)O</chem>        | -5.7 |
| model_55   | Kaempferol 3,4,7-triacetate                                       | <chem>CC(=O)Oc1ccc(cc1)c1oc2cc(OC(=O)C)cc(c2c(=O)c1OC(=O)C)O</chem>      | -5.7 |
| model_583  | 2H-1-Benzopyran-5-ol                                              | <chem>CCCCCc1ccc2c(c1O)C=CC(O2)(C)C</chem>                               | -5.7 |

|            |                                             |                                                                      |      |
|------------|---------------------------------------------|----------------------------------------------------------------------|------|
| model_669  | Dehydrotoxicarol                            | <chem>COc1cc2OCc3c(c2cc1OC)c(=O)c1c(o3)c2C=CC(Oc2cc1O)(C)C</chem>    | -5.7 |
| model_800  | Ophiopogonanone F                           | <chem>COc1ccc(c(c1)O)CC1COc2c(C1=O)c(OC)c(c(c2OC)O)C</chem>          | -5.7 |
| model_847  | Arteanoflavone                              | <chem>COc1c(OC)cc(cc1OC)c1cc(=O)c2c(o1)cc(c(c2O)OC)O</chem>          | -5.7 |
| model_910  | Nevadensin                                  | <chem>COc1ccc(cc1)c1cc(=O)c2c(o1)c(OC)c(c(c2O)OC)O</chem>            | -5.7 |
| model_1050 | Hexamethylquercetagenin                     | <chem>COc1ccc(cc1OC)c1oc2cc(OC)c(c(c2c(=O)c1OC)OC)OC</chem>          | -5.6 |
| model_164  | Vitexicarpin/Casticin                       | <chem>COc1cc2oc(c3ccc(c(c3)O)OC)c(c(=O)c2c(c1OC)O)OC</chem>          | -5.6 |
| model_229  | Artemetin                                   | <chem>COc1ccc(cc1OC)c1oc2cc(OC)c(c(c2c(=O)c1OC)O)OC</chem>           | -5.6 |
| model_751  | 5-O-Demethylnobiletin                       | <chem>COc1cc(ccc1OC)c1cc(=O)c2c(o1)c(OC)c(c(c2O)OC)OC</chem>         | -5.6 |
| model_189  | Isoapetalic acid                            | <chem>CCCC(c1c2OC(C)C(C(=O)c2c(c2c1OC(C)(C)C=C2)O)C)CC(=O)O</chem>   | -5.5 |
| model_364  | Artemetin acetate                           | <chem>COc1ccc(cc1OC)c1oc2cc(OC)c(c(c2c(=O)c1OC)OC(=O)C)O</chem>      | -5.5 |
| model_131  | 8-Hydroxy-3,5,7,3',4',5'-hexamethoxyflavone | <chem>COc1cc(cc(c1OC)OC)c1oc2c(O)c(OC)cc(c2c(=O)c1OC)OC</chem>       | -5.4 |
| model_343  | Khellin                                     | <chem>COc1c2c(=O)cc(oc2c(c2c1cco2)OC)C</chem>                        | -5.4 |
| model_968  | 5'-Methoxynobiletin                         | <chem>COc1c(OC)cc(cc1OC)c1cc(=O)c2c(o1)c(OC)c(c(c2OC)OC)OC</chem>    | -5.4 |
| model_256  | Araneosol                                   | <chem>COc1ccc(cc1)c1oc2c(OC)c(O)c(c(c2c(=O)c1OC)O)OC</chem>          | -5.3 |
| model_1009 | 3,3',4',5,6,7,8-heptamethoxyflavone         | <chem>COc1cc(ccc1OC)c1oc2c(OC)c(OC)c(c(c2c(=O)c1OC)OC)O</chem>       | -5.2 |
| model_636  | Maltol                                      | <chem>O=c1ccoc(c1O)C</chem>                                          | -5.2 |
| model_109  | 3',4',5',3,5,6,7-Heptamethoxyflavone        | <chem>COc1c(OC)cc(cc1OC)c1oc2cc(OC)c(c(c2c(=O)c1OC)OC)O</chem>       | -5   |
| model_36   | Exoticin                                    | <chem>COc1c(OC)cc(cc1OC)c1oc2c(OC)c(OC)c(c(c2c(=O)c1OC)O)C)OC</chem> | -5   |

**Supplementary Table S2:** Kinase targets of top 4 lead flavonoids (The top 4 lead flavonoids, 5-Dehydroxyparatocarpin K, Carpachromene, Sanggenone H, and Kuwanol C were represented as L1, L2, L3, and L4 respectively).

| Target                                                                               | Common name | Uniprot ID       | ChEMBL ID         | L1  | L2  | L3  | L4  |
|--------------------------------------------------------------------------------------|-------------|------------------|-------------------|-----|-----|-----|-----|
| 3-phosphoinositide dependent protein kinase-1                                        | PDPK1       | O15530           | CHEMBL2534        |     |     | Yes |     |
| CaM kinase II                                                                        | CAMK2D      | Q13557           | CHEMBL2801        |     |     |     | Yes |
| Casein kinase I gamma 1                                                              | CSNK1G1     | Q9HCP0           | CHEMBL2426        |     |     | Yes |     |
| Casein kinase II alpha                                                               | CSNK2A1     | P68400           | CHEMBL3629        |     | Yes |     |     |
| CDC7/DBF4 (Cell division cycle 7-related protein kinase/Activator of S phase kinase) | CDC7        | O00311           | CHEMBL5443        | Yes |     |     |     |
| CDK2/Cyclin A                                                                        | CCNA2 CDK2  | P20248<br>P24941 | CHEMBL30384<br>69 |     |     |     | Yes |
| c-Jun N-terminal kinase 3                                                            | MAPK10      | P53779           | CHEMBL2637        |     |     |     | Yes |
| Cyclin-dependent kinase 1                                                            | CDK1        | P06493           | CHEMBL308         | Yes |     |     |     |
| Cyclin-dependent kinase 2                                                            | CDK2        | P24941           | CHEMBL301         |     |     | Yes |     |
| Cyclin-dependent kinase 2/cyclin E1                                                  | CCNE1 CDK2  | P24864<br>P24941 | CHEMBL19076<br>05 |     |     |     | Yes |
| Cyclin-dependent kinase 4                                                            | CDK4        | P11802           | CHEMBL331         |     |     | Yes |     |
| Cyclin-dependent kinase 5/CDK5 activator 1                                           | CDK5R1 CDK5 | Q15078<br>Q00535 | CHEMBL19076<br>00 |     | Yes |     | Yes |
| Cyclin-dependent kinase 6                                                            | CDK6        | Q00534           | CHEMBL2508        |     | Yes |     |     |
| Dual specificity protein kinase TTK                                                  | TTK         | P33981           | CHEMBL3983        |     |     |     | Yes |
| Ephrin receptor                                                                      | EPHB4       | P54760           | CHEMBL5147        |     |     | Yes |     |
| Epidermal growth factor receptor erbB1                                               | EGFR        | P00533           | CHEMBL203         |     |     | Yes | Yes |
| Focal adhesion kinase 1                                                              | PTK2        | Q05397           | CHEMBL2695        |     |     | Yes |     |
| G protein-coupled receptor kinase 6                                                  | GRK6        | P43250           | CHEMBL6144        |     | Yes |     |     |
| Glycogen synthase kinase-3 alpha                                                     | GSK3A       | P49840           | CHEMBL2850        |     |     | Yes |     |
| Glycogen synthase kinase-3 beta                                                      | GSK3B       | P49841           | CHEMBL262         |     |     | Yes |     |
| Inhibitor of nuclear factor kappa B kinase epsilon subunit                           | IKBKE       | Q14164           | CHEMBL3529        | Yes |     |     |     |
| Kinesin-1 heavy chain/ Tyrosine-protein kinase receptor RET                          | RET         | P07949           | CHEMBL2041        |     |     |     | Yes |
| LIM domain kinase 1                                                                  | LIMK1       | P53667           | CHEMBL3836        |     |     |     | Yes |
| LIM domain kinase 2                                                                  | LIMK2       | P53671           | CHEMBL5932        |     |     |     | Yes |
| MAP kinase ERK2                                                                      | MAPK1       | P28482           | CHEMBL4040        | Yes |     | Yes |     |

|                                                       |         |        |               |     |     |     |     |
|-------------------------------------------------------|---------|--------|---------------|-----|-----|-----|-----|
| MAP kinase p38 beta                                   | MAPK11  | Q15759 | CHEMBL3961    |     |     |     | Yes |
| MAP kinase signal-integrating kinase 2                | MKNK2   | Q9HBH9 | CHEMBL4204    |     |     | Yes |     |
| Maternal embryonic leucine zipper kinase              | MELK    | Q14680 | CHEMBL4578    |     |     |     | Yes |
| Mitogen-activated protein kinase kinase kinase 4      | MAP4K4  | O95819 | CHEMBL6166    |     |     | Yes |     |
| Platelet-derived growth factor receptor beta          | PDGFRB  | P09619 | CHEMBL1913    |     |     |     | Yes |
| Protein kinase C alpha                                | PRKCA   | P17252 | CHEMBL299     |     | Yes |     |     |
| Protein kinase C beta                                 | PRKCB   | P05771 | CHEMBL3045    |     | Yes |     |     |
| Protein kinase C delta                                | PRKCD   | Q05655 | CHEMBL2996    |     | Yes |     |     |
| Protein kinase C epsilon                              | PRKCE   | Q02156 | CHEMBL3582    |     | Yes |     |     |
| Protein kinase C eta                                  | PRKCH   | P24723 | CHEMBL3616    |     | Yes |     |     |
| Protein kinase C gamma                                | PRKCG   | P05129 | CHEMBL2938    |     | Yes |     |     |
| Proto-oncogene tyrosine-protein kinase MER            | MERTK   | Q12866 | CHEMBL5331    | Yes |     |     |     |
| Pyruvate dehydrogenase kinase isoform 1               | PDK1    | Q15118 | CHEMBL4766    |     |     | Yes | Yes |
| Receptor protein-tyrosine kinase erbB-2               | ERBB2   | P04626 | CHEMBL1824    |     | Yes |     | Yes |
| Rho-associated protein kinase 1                       | ROCK1   | Q13464 | CHEMBL3231    | Yes |     | Yes | Yes |
| Rho-associated protein kinase 2                       | ROCK2   | O75116 | CHEMBL2973    | Yes | Yes |     | Yes |
| Ribosomal protein S6 kinase 1                         | RPS6KB1 | P23443 | CHEMBL4501    |     |     | Yes |     |
| Ribosomal protein S6 kinase alpha 1                   | RPS6KA1 | Q15418 | CHEMBL2553    |     |     | Yes |     |
| Serine/threonine-protein kinase 17B                   | STK17B  | O94768 | CHEMBL3980    | Yes |     |     | Yes |
| Serine/threonine-protein kinase Aurora-A              | AURKA   | O14965 | CHEMBL4722    | Yes |     | Yes | Yes |
| Serine/threonine-protein kinase Aurora-B              | AURKB   | Q96GD4 | CHEMBL2185    | Yes |     | Yes | Yes |
| Serine/threonine-protein kinase B-raf                 | BRAF    | P15056 | CHEMBL5145    | Yes |     | Yes | Yes |
| Serine/threonine-protein kinase Chk1                  | CHEK1   | O14757 | CHEMBL4630    | Yes |     | Yes | Yes |
| Serine/threonine-protein kinase Chk2                  | CHEK2   | O96017 | CHEMBL2527    | Yes | Yes |     |     |
| Serine/threonine-protein kinase mTOR                  | MTOR    | P42345 | CHEMBL2842    |     |     | Yes |     |
| Serine/threonine-protein kinase PLK1                  | PLK1    | P53350 | CHEMBL3024    | Yes |     |     |     |
| Serine/threonine-protein kinase RAF                   | RAF1    | P04049 | CHEMBL1906    |     |     | Yes | Yes |
| Serine/threonine-protein kinase Sgk1                  | SGK1    | O00141 | CHEMBL2343    |     |     | Yes |     |
| Serine/threonine-protein kinase TAO1                  | TAOK1   | Q7L7X3 | CHEMBL5261    | Yes |     |     |     |
| Serine/threonine-protein kinase TAO3                  | TAOK3   | Q9H2K8 | CHEMBL5701    | Yes |     |     |     |
| Serine/threonine-protein kinase TBK1                  | TBK1    | Q9UHD2 | CHEMBL5408    | Yes |     |     |     |
| Serine/threonine-protein kinase WEE1                  | WEE1    | P30291 | CHEMBL5491    |     |     | Yes |     |
| Serine/threonine-protein kinase/endoribonuclease IRE1 | ERN1    | O75460 | CHEMBL1163101 | Yes |     | Yes | Yes |

|                                               |       |        |            |     |     |     |     |
|-----------------------------------------------|-------|--------|------------|-----|-----|-----|-----|
| Sphingosine kinase 1                          | SPHK1 | Q9NYA1 | CHEMBL4394 |     |     | Yes |     |
| Sphingosine kinase 2                          | SPHK2 | Q9NRA0 | CHEMBL3023 |     |     | Yes |     |
| Tyrosine-protein kinase ABL                   | ABL1  | P00519 | CHEMBL1862 |     | Yes |     | Yes |
| Tyrosine-protein kinase ITK/TSK               | ITK   | Q08881 | CHEMBL2959 |     |     |     | Yes |
| Tyrosine-protein kinase LCK                   | LCK   | P06239 | CHEMBL258  |     |     |     | Yes |
| Tyrosine-protein kinase receptor FLT3         | FLT3  | P36888 | CHEMBL1974 | Yes |     |     | Yes |
| Tyrosine-protein kinase SYK                   | SYK   | P43405 | CHEMBL2599 | Yes | Yes |     | Yes |
| Tyrosine-protein kinase SYK                   | SYK   | P43405 | CHEMBL2599 |     |     | Yes |     |
| Vascular endothelial growth factor receptor 1 | FLT1  | P17948 | CHEMBL1868 |     |     |     | Yes |

**A**

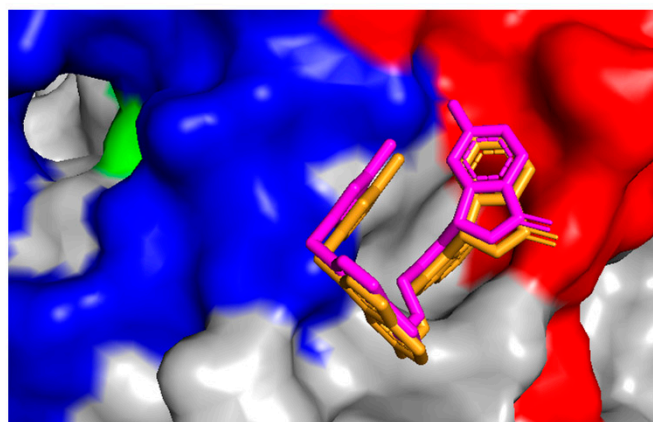

**B**

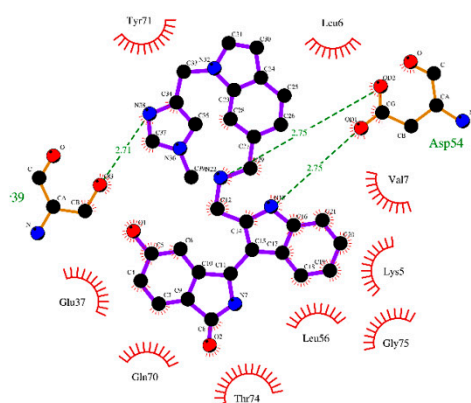

KRAS G12D-BI-2852 crystalline

**C**

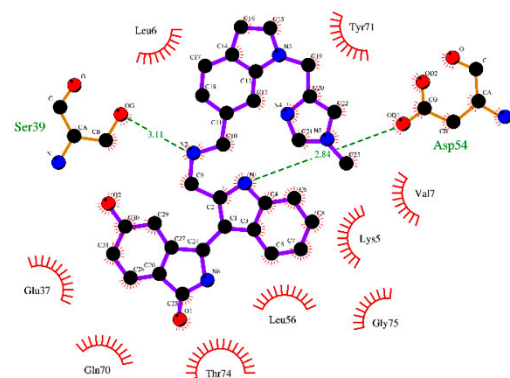

KRAS G12D\_BI-2852 docked

**Supplementary Figure S1:** Binding poses and molecular interactions of BI-2852 in crystallized and docked forms. [A] The P-loop (residues 10-17), Switch I (residues 25-40), and Switch II (residues 57-76) were shown in green, blue, and red color respectively, and the crystallized and docked forms of BI-2852 were shown in magenta and bright yellow color respectively. [B] Molecular interactions of BI-2852 in crystallized form. [C] Molecular interactions of BI-2852 in docked form. In both crystallized and docked forms, the Indole group near to the Isatin group of BI-2852 have closer interaction in the SI/II region, and also showed similar type of interactions with the residues of KRAS G12D mutant protein.



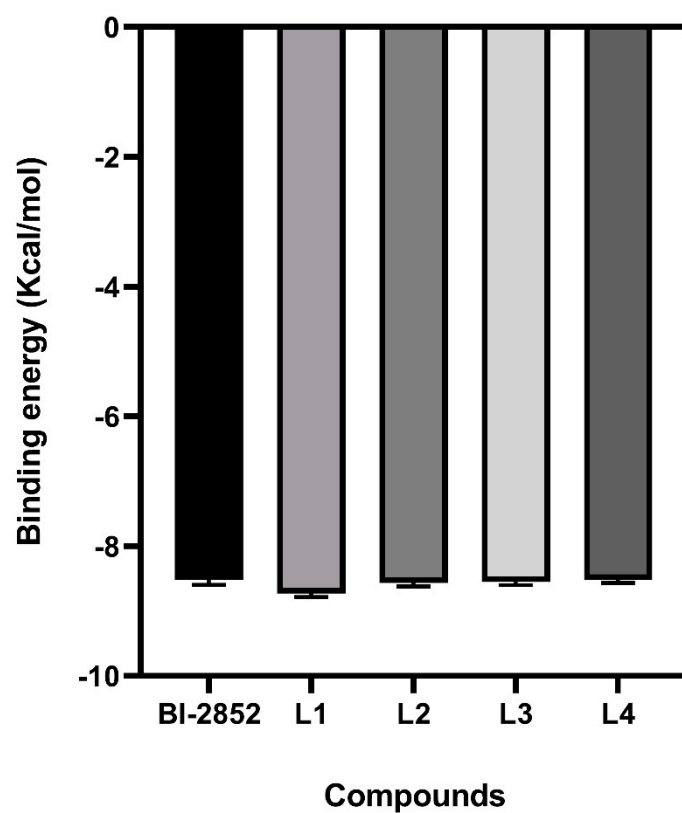

**Supplementary Figure S2:** Binding energies of BI-2852 and top 4 lead flavonoids against KRAS G12D mutant protein.
